# Supplementary material
Source: PubMed Central journal article supplement (PMC8733853)
Supplement: mmc2.pdf [file mmc2.pdf]

# THE LANCET

## Supplementary appendix

This appendix formed part of the original submission and has been peer reviewed. We post it as supplied by the authors.

Supplement to: Katikireddi SV, Cerqueira-Silva T, Vasileiou E, et al. Two-dose ChAdOx1 nCoV-19 vaccine protection against COVID-19 hospital admissions and deaths over time: a retrospective, population-based cohort study in Scotland and Brazil. *Lancet* 2021; published online Dec 20. [https://doi.org/10.1016/S0140-6736\(21\)02754-9](https://doi.org/10.1016/S0140-6736(21)02754-9).

## **Supplementary Appendix: Two-dose ChAdOx1 vaccine protection against SARS-CoV-2 symptomatic infections, and COVID-19 hospitalisations and deaths over time: Population-based cohort studies in Scotland and Brazil**

|                                                                                                                                                                                                                      |    |
|----------------------------------------------------------------------------------------------------------------------------------------------------------------------------------------------------------------------|----|
| Table S1: Joint Committee on Vaccination and Immunisation (JCVI) COVID-19 vaccination priority list, Scotland .....                                                                                                  | 3  |
| Table S2: Brazilian Ministry of Health National Covid-19 Immunisation Plan .....                                                                                                                                     | 6  |
| Table S3: Additional population characteristics for Scotland .....                                                                                                                                                   | 8  |
| Table S4: Additional population characteristics for Brazil .....                                                                                                                                                     | 9  |
| Table S5: QCovid risk groups and codes .....                                                                                                                                                                         | 10 |
| Table S6: Study population for test-negative case-control design in Scotland .....                                                                                                                                   | 11 |
| Table S7: Study population for test-negative design case-control study in Brazil.....                                                                                                                                | 15 |
| Table S8: Rate ratios for severe COVID-19 (i.e. COVID-19 hospitalisation or death) over time since completing two ChAdOx1 doses in Scotland for: a) Overall adult population; b) Stratified by age group.....        | 16 |
| Table S9: Rate ratios for confirmed SARS-CoV-2 symptomatic infections over time since completing two doses in Scotland for: a) Overall adult population; b) Stratified by age group .....                            | 18 |
| Table S10: Trend test for: a) Overall adult population; b) Stratified by age group .....                                                                                                                             | 20 |
| Table S11: Rate ratios for COVID-19 hospitalisations over time since completing two ChAdOx1 doses in Scotland for the overall adult population.....                                                                  | 21 |
| Table S12: Rate ratios for COVID-19 death over time since completing two ChAdOx1 doses in Scotland for the overall adult population.....                                                                             | 21 |
| Table S13: Rate ratios for severe COVID-19 (hospitalisation/death) over time since completing two ChAdOx1 doses in Brazil for: a) Overall adult population; b) Stratified by age group.....                          | 22 |
| Table S14: Rate ratios for COVID-19 death over time since completing two ChAdOx1 doses in Brazil for the overall adult population.....                                                                               | 24 |
| Table S15: Rate ratios for confirmed symptomatic SARS-CoV-2 infections over time since completing two ChAdOx1 doses in Brazil, overall and age-stratified .....                                                      | 25 |
| Table S17: Vaccine effectiveness estimates in Brazil, restricted to follow-up when presence of delta variant was minimal (sensitivity analysis).....                                                                 | 27 |
| Table S18: Rate ratios for Covid-19 hospitalisations over time since completing two ChAdOx1 doses in Brazil for: a) Overall adult population; b) Stratified by age group .....                                       | 28 |
| Table S19: Rate ratios for COVID-19 deaths over time since completing two ChAdOx1 doses in Brazil for: a) Overall adult population; b) Stratified by age group .....                                                 | 30 |
| Table S20: Vaccine effectiveness estimates for ChAdOx1 against hospitalisations or mortality by length of time since two-dose vaccination in Scotland (reference group: unvaccinated), stratified by age group ..... | 32 |
| Table S21: Rate ratios over time since receiving two ChAdOx1 doses for severe COVID-19 in Scotland using Pillar 2 testing (sensitivity analysis).....                                                                | 34 |
| Table S22: Vaccine effectiveness estimates in Scotland for severe COVID-19 using Pillar 2 testing for outcome ascertainment in Scotland (sensitivity analysis).....                                                  | 34 |
| Table S23: Rate ratios over time since receiving two ChAdOx1 doses for severe COVID-19 in Scotland among 40-64 year olds (sensitivity analysis) .....                                                                | 35 |
| Table S24: Vaccine effectiveness against severe COVID-19 estimated using an alternative reference period (0-13 days post-first ChAdOx1 dose) in Scotland .....                                                       | 35 |

|                                                                                                                                                                                                                                        |    |
|----------------------------------------------------------------------------------------------------------------------------------------------------------------------------------------------------------------------------------------|----|
| Table S25: Vaccine effectiveness estimates for ChAdOx1 against COVID-19 hospitalisations or death by length of time since full vaccination in Brazil (reference group: 0-13 days post-first dose vaccination), stratified by age ..... | 36 |
| Table S25: Rate ratios over time since receiving two ChAdOx1 doses for severe COVID-19 in Scotland using an incidence-density matched case-control design (sensitivity analysis) .....                                                 | 38 |
| Table S26: Formulae for models .....                                                                                                                                                                                                   | 38 |
| Table S26: Estimates of covariates from main adjusted models for the primary outcome (COVID-19 hospitalisation or death) in two-dose and vaccine effectiveness cohorts in Scotland.....                                                | 39 |
| Table S29: ICD-10 codes for COVID-19 illness.....                                                                                                                                                                                      | 45 |
| Table S30: Reporting STROBE and RECORD checklists .....                                                                                                                                                                                | 46 |
|                                                                                                                                                                                                                                        |    |
| Figure S1: Distribution of variants over time in Scotland .....                                                                                                                                                                        | 52 |
| Figure S2: Data linkage diagram for Scotland .....                                                                                                                                                                                     | 53 |
| Figure S3: Data linkage diagram for Brazil .....                                                                                                                                                                                       | 55 |
| Figure S4: Distribution of variants over time in Brazil, stratified by region.....                                                                                                                                                     | 57 |
| Figure S5: ChAdOx1 two-dose vaccination numbers in Scotland, stratified by age group.....                                                                                                                                              | 58 |
| Figure S6: STROBE Flow diagram for Scotland.....                                                                                                                                                                                       | 59 |
| Figure S7: Trends in COVID-related outcomes in Scotland for: a) COVID-19 hospitalisation or death; b) COVID-19 hospitalisation; c) COVID-19 death; d) SARS-CoV-2 confirmed infection .....                                             | 61 |
| Figure S8: Association between waning and calendar period effects for vaccines aged 65+ in Scotland .....                                                                                                                              | 63 |
| Figure S9: STROBE Flow diagram for Brazil.....                                                                                                                                                                                         | 65 |
| Figure S10: Monthly numbers of: a) COVID-19 hospitalisation or death; b) COVID-19 hospitalisation; c) COVID-19 death; d) SARS-CoV-2 confirmed symptomatic infection in Brazil, stratified by age group .....                           | 66 |
| Figure S11: Cumulative uptake for receipt of any vaccination in Brazil, stratified by age group.....                                                                                                                                   | 68 |
| Figure S12: ChAdOx1 vaccination numbers in Brazil, stratified by age group.....                                                                                                                                                        | 68 |

**Table S1: Joint Committee on Vaccination and Immunisation (JCVI) COVID-19 vaccination priority list, Scotland**

| Order of priority                           | Group*                                                                                                                                                                                                         | Estimated population                                     |
|---------------------------------------------|----------------------------------------------------------------------------------------------------------------------------------------------------------------------------------------------------------------|----------------------------------------------------------|
| <b>Phase 1 of the vaccination programme</b> |                                                                                                                                                                                                                |                                                          |
| 1                                           | Residents and workers in care homes for older people                                                                                                                                                           | 30,000 residents;<br>45,000 staff                        |
| 2                                           | All those over 80 years of age and over                                                                                                                                                                        | 250,000                                                  |
|                                             | Patient facing, frontline healthcare workers                                                                                                                                                                   | 230,000                                                  |
|                                             | Non-clinical but patient facing staff in secondary or primary care/community healthcare settings                                                                                                               |                                                          |
|                                             | Laboratory and pathology staff                                                                                                                                                                                 |                                                          |
|                                             | Social care staff directly involved in the care of their service users and others involved directly in delivering social care such that they and vulnerable patients/clients are at increased risk of exposure |                                                          |
| 3                                           | All those 75 years of age and over                                                                                                                                                                             | 190,000                                                  |
| 4                                           | All those 70 years of age and over and clinically extremely vulnerable individuals                                                                                                                             | 280,000 over 70; 110,000 clinically extremely vulnerable |
| 5                                           | All those 65 years of age and over                                                                                                                                                                             | 280,000                                                  |
| 6                                           | All individuals aged 16 years to 64 years with underlying health conditions which put them at higher risk of serious disease and mortality and Unpaid carers                                                   | 1,010,000                                                |
| 7                                           | All those 60 years of age and over                                                                                                                                                                             | 280,000                                                  |
| 8                                           | All those 55 years of age and over                                                                                                                                                                             | 330,000                                                  |
| 9                                           | All those 50 years of age and over                                                                                                                                                                             | 340,000                                                  |
| <b>Phase 2 of the vaccination programme</b> |                                                                                                                                                                                                                |                                                          |

|   |                               |
|---|-------------------------------|
| 1 | All those aged 40 to 49 years |
| 2 | All those aged 30 to 39 years |
| 3 | All those 18 to 29 years      |

\*These groups represent around 99% of preventable mortality from COVID-19

The vaccine roll-out strategy has been determined by an independent UK-wide body, namely the Joint Commission on Vaccinations and Immunisation (JCVI),[1] which has prioritised vaccinations to adults on the basis of assessing the risk of serious COVID-19 outcomes, in particular hospitalisations and deaths.[1] In Scotland, the vaccination programme is rolled out into two phases. Phase 1 included all adults over the age of 50, those with underlying health conditions and health or social care workers. Phase 2 included all adults under the age of 50 not already vaccinated as part of priority groups 1 to 9 in Phase1.[2,3] First and second doses of Pfizer-BioNTech, Oxford-AstraZeneca and Moderna vaccines are currently administered in Scotland. Pfizer-BioNTech and Oxford-AstraZeneca vaccines were approved by United Kingdom's (UK) Medicines and Healthcare products Regulatory Agency (MHRA) on 8 December 2020 and Moderna was approved on 8 January 2021.[1] On 7 May 2021, JCVI announced that all adults aged 18-39 years olds should not be offered the Oxford-AstraZeneca vaccine due to increased risk of blood clots and bleeding post-vaccination in younger adults.[4]

Individuals in these priority groups received a written invitation ~14 days before their appointment. They were asked however to delay their vaccination if they had recently had COVID-19, tested positive or were self-isolating. These invitations were accompanied by written advice on the need to observe behavioural measures to reduce the risk of contracting the infection.

Prior to vaccination, checks were made by the trained administering staff to see if individuals had COVID-19 or tested positive in the preceding 4 weeks; if so, the vaccination was deferred. Immediately following vaccination, individuals received both verbal and written advice on the need to maintain behavioural measures, particularly in the 2-3 weeks following vaccination.

Because of the different storage requirements for the two vaccines, GPs have administered the Oxford-AstraZeneca vaccine and vaccine centres have mainly administered the Pfizer-BioNTech vaccine. Guided by JCVI priorities, GPs began by focusing their efforts on: a) the mobile elderly who they vaccinated in their general practice surgeries; and b) care home residents affiliated with general practices. Vaccination centres began with focusing on health and social care providers before extending to other JCVI priority groups. By February 22nd 2021, Group 7 vaccination was underway and a full roll-out of invitations to Group 6 started.

**References:**

[1] Joint Committee on Vaccination and Immunisation. Priority groups for coronavirus (COVID-19) vaccination: advice from the JCVI, 30 December 2020. Available from: <https://www.gov.uk/government/publications/priority-groups-for-coronavirus-covid-19-vaccination-advice-from-the-jcvi-30-december-2020>

[2] Scottish Government. Coronavirus (COVID-19): vaccine deployment plan 2021. Available from: <https://www.gov.scot/publications/coronavirus-covid-19-vaccine-deployment-plan-2021/>

[3] Scottish Government. . Coronavirus (COVID-19): vaccine deployment plan: update – July 2021. Available from: <https://www.gov.scot/publications/coronavirus-covid-19-vaccine-deployment-plan-update---july-2021/documents/>

[4] Public Health England. COVID-19 vaccination and blood clotting. Available at:

<https://www.gov.uk/government/publications/covid-19-vaccination-and-blood-clotting/covid-19-vaccination-and-blood-clotting>

**Table S2: Brazilian Ministry of Health National Covid-19 Immunisation Plan**

| Order of Priority | Group                                                                                                                                                                                                                                            | Estimated Population |
|-------------------|--------------------------------------------------------------------------------------------------------------------------------------------------------------------------------------------------------------------------------------------------|----------------------|
| 1                 | Elderly people in nursing homes, aged 60 years and older                                                                                                                                                                                         | 160,472              |
| 2                 | People with Disabilities in nursing homes                                                                                                                                                                                                        | 6,472                |
| 3                 | Indigenous Peoples Living in Indigenous Lands                                                                                                                                                                                                    | 413,739              |
| 4                 | Health Workers                                                                                                                                                                                                                                   | 7,337,807            |
| 5                 | People aged 90 years and older                                                                                                                                                                                                                   | 893,873              |
| 6                 | People aged 85 to 89                                                                                                                                                                                                                             | 1,299,948            |
| 7                 | People aged 80 to 84                                                                                                                                                                                                                             | 2,247,225            |
| 8                 | People aged 75 to 79                                                                                                                                                                                                                             | 3,614,384            |
| 9                 | Traditional Peoples and Communities Riverside                                                                                                                                                                                                    | 632,815              |
| 10                | Traditional Quilombola Peoples and Communities                                                                                                                                                                                                   | 1,184,383            |
| 11                | People aged 70 to 74                                                                                                                                                                                                                             | 5,408,657            |
| 12                | People aged 65 to 69                                                                                                                                                                                                                             | 7,349,241            |
| 13                | People aged 60 to 64                                                                                                                                                                                                                             | 9,383,724            |
| 14                | People with comorbidities and pregnant women and puerperal women with Comorbidities (n=18,218,730); Persons with Permanent Disabilities registered in federal social assistance (BPC) (n=1,467,477); Pregnant and Postpartum women (n=2,488,052) | 22.174.259           |
| 15                | Persons with Permanent Disabilities (18 to 59 years) not registered at BPC                                                                                                                                                                       | 6,281,581            |
| 16                | Homeless people (18 to 59 years)                                                                                                                                                                                                                 | 140,559              |
| 17                | Employees of the Prisons (n=108,949) and Prisoners (n=753,966)                                                                                                                                                                                   | 862,915              |
| 18                | Primary Education Workers (daycare, preschools, elementary school, high school)                                                                                                                                                                  | 2,707,200            |
| 19                | Higher Education Workers                                                                                                                                                                                                                         | 719,818              |
| 20                | Security and Rescue Forces (n=604,511), Army, Navy and Airforce (n=364,631)                                                                                                                                                                      | 969.142              |
| 21                | Public Transport Workers                                                                                                                                                                                                                         | 678,264              |
| 22                | Rail and Metro Transport Workers                                                                                                                                                                                                                 | 73,504               |
| 23                | Air Transport Workers                                                                                                                                                                                                                            | 165,944              |
| 24                | Waterway Transport Workers                                                                                                                                                                                                                       | 41,515               |
| 25                | Truck Drivers                                                                                                                                                                                                                                    | 1,241,061            |
| 26                | Port Workers                                                                                                                                                                                                                                     | 111,397              |
| 27                | Industrial Workers                                                                                                                                                                                                                               | 5,323,291            |
| 28                | Urban cleaning and solid waste management workers                                                                                                                                                                                                | 228,218              |
| 29                | General Population - People aged 18 to 59                                                                                                                                                                                                        | 76,443,686           |
| Total             |                                                                                                                                                                                                                                                  | 158,095,094          |

The vaccine roll-out strategy for Brazil has been determined by the Ministry of Health – Health Surveillance Secretariat – National Immunisation Programme, advised by a commission with representatives of the states, municipalities, health professional associations and the Pan American Health Organisation – World Health Organisation (PAHO – WHO). The reference document for the vaccine roll-out strategy (National Covid-19 immunisation plan) has been updated on monthly basis and is available on the following link: <https://www.gov.br/saude/pt-br/coronavirus/publicacoes-tecnicas/guias-e-planos/plano-nacional-de-vacinacao-covid-19/view>

The plan defines guidelines for vaccines administration and determines the delivery of doses for the 5,570 municipalities and the federal district, which administered the doses to their resident population. Immunisation pace varied in each municipality due to factors such as vaccine availability, local health facilities capabilities, and resident priority groups adherence.

Each municipality had its own communication strategy to call the population to receive the doses. In most of the cases there was no individual written invitation. Usually posting the schedule in the Municipal Health Secretariat Website and local media notices sufficed for people to show on the indicated health facilities. Larger cities often launched websites and mobile phone apps for scheduling the doses.

The population was not routinely tested for previous or active COVID-19 infections, but if they had any COVID-19 related symptoms they were instructed to postpone vaccination for 4 weeks. Different vaccine types were not targeted at different

population subgroups, except for pregnant women who were not usually given ChAdOx1. However, for all other patient groups, the specific vaccine type administered depended on availability, with patients not offered a choice over their vaccine type.



**Table S3: Additional population characteristics for Scotland**

| Characteristic             | Level                    | Two-dose cohort   | VE cohort         |
|----------------------------|--------------------------|-------------------|-------------------|
| Number of previous tests * | 0                        | 1,374,415 (69.7%) | 2,081,024 (82.1%) |
|                            | 1                        | 354,730 (18.0%)   | 315,770 (12.5%)   |
|                            | 2                        | 123,457 (6.3%)    | 73,019 (2.9%)     |
|                            | 3-4                      | 70,912(3.6%)      | 33,310 (1.3%)     |
|                            | 5-9                      | 30,724(1.6%)      | 16,753 (0.7%)     |
|                            | 10+                      | 18,216 (0.9%)     | 14,652 (0.6%)     |
| Number of risk groups †    | 0                        | 994,558 (50.4%)   | 1,363,199 (53.8%) |
|                            | 1                        | 567,960 (28.8%)   | 698,667 (27.6%)   |
|                            | 2                        | 241,737 (12.3%)   | 281,194 (11.1%)   |
|                            | 3                        | 99,184 (5.1%)     | 112,488 (4.4%)    |
|                            | 4                        | 42,029 (2.1%)     | 47,647 (1.9%)     |
|                            | ≥5                       | 26,986 (1.4%)     | 31,333 (1.2%)     |
| Urban/Rural index          | 1 Large Urban Areas      | 595,827 (30.2%)   | 852,840 (33.6%)   |
|                            | 2 Other Urban Areas      | 749,514 (38.0%)   | 926,846 (36.6%)   |
|                            | 3 Accessible Small Towns | 200,861 (10.2%)   | 240,976 (9.5%)    |
|                            | 4 Remote Small Towns     | 108,106 (5.5%)    | 129,347 (5.1%)    |
|                            | 5 Accessible Rural       | 200,579(10.2%)    | 239,566 (9.5%)    |
|                            | 6 Remote Rural           | 107,402 (5.4%)    | 126,368 (5.0%)    |
|                            | Unknown                  | 10,165 (0.5%)     | 18,584 (0.7%)     |

\* Number of previous tests: Proxy for working in a high-risk occupation (e.g. healthcare worker)

† Number of risk groups: Individual QCovid risk groups found in Table S13

**Table S4: Additional population characteristics for Brazil**

| Characteristic       | Level                                   | Two dose cohort    | VE cohort          |
|----------------------|-----------------------------------------|--------------------|--------------------|
| Region               | Northeast                               | 10,105,954 (23.7%) | 14,254,472 (25.4%) |
|                      | North                                   | 3,046,408 (7.2%)   | 4,587,710 (8.2%)   |
|                      | Southeast                               | 18,666,201 (43.9%) | 23,968,607 (42.8%) |
|                      | South                                   | 7,300,485 (17.2%)  | 8,764,490 (15.6%)  |
|                      | Central West                            | 3,223,931 (7.6%)   | 4,132,622 (7.4%)   |
|                      | Unknown                                 | 215,860 (0.5%)     | 305,737 (0.5%)     |
| Vaccination category | High risk age group                     | 24,069,720 (56.6%) | 34,008,604 (60.7%) |
|                      | Comorbidities/Pregnant/Puerperal period | 8,627,958 (20.3%)  | 9,663,617 (17.3%)  |
|                      | General workforce                       | 3,632,578 (8.5%)   | 4,319,301 (7.7%)   |
|                      | Health Care Workers                     | 4,559,818 (10.7%)  | 5,533,679 (9.9%)   |
|                      | Indigenous or Traditional community     | 628,170 (1.5%)     | 800,217 (1.4%)     |
|                      | Other/Missing                           | 704,499 (1.7%)     | 1,206,068 (2.2%)   |
|                      | Vulnerable Population                   | 336,048 (0.8%)     | 482,004 (0.9%)     |

**Table S5: QCovid risk groups and codes**

| QCovid risk group                                                                                                                                                                                                                                                                                                                                                               | Code                |
|---------------------------------------------------------------------------------------------------------------------------------------------------------------------------------------------------------------------------------------------------------------------------------------------------------------------------------------------------------------------------------|---------------------|
| Atrial fibrillation                                                                                                                                                                                                                                                                                                                                                             | Q_DIAG_AF           |
| Asthma                                                                                                                                                                                                                                                                                                                                                                          | Q_DIAG_ASTHMA       |
| Blood cancer                                                                                                                                                                                                                                                                                                                                                                    | Q_DIAG_BLOOD_CANCER |
| Heart failure                                                                                                                                                                                                                                                                                                                                                                   | Q_DIAG_CCF          |
| Cerebral palsy                                                                                                                                                                                                                                                                                                                                                                  | Q_DIAG_CEREBALPALSY |
| Coronary heart disease                                                                                                                                                                                                                                                                                                                                                          | Q_DIAG_CHD          |
| Cirrhosis                                                                                                                                                                                                                                                                                                                                                                       | Q_DIAG_CIRRHOSIS    |
| Congenital heart disease                                                                                                                                                                                                                                                                                                                                                        | Q_DIAG_CONGEN_HD    |
| COPD                                                                                                                                                                                                                                                                                                                                                                            | Q_DIAG_COPD         |
| Dementia                                                                                                                                                                                                                                                                                                                                                                        | Q_DIAG_DEMENTIA     |
| Diabetes type 1                                                                                                                                                                                                                                                                                                                                                                 | Q_DIAG_DIABETES_1   |
| Diabetes type 2                                                                                                                                                                                                                                                                                                                                                                 | Q_DIAG_DIABETES_2   |
| Epilepsy                                                                                                                                                                                                                                                                                                                                                                        | Q_DIAG_EPILEPSY     |
| Fracture                                                                                                                                                                                                                                                                                                                                                                        | Q_DIAG_FRACTURE     |
| Neurological disorder                                                                                                                                                                                                                                                                                                                                                           | Q_DIAG_NEURO        |
| Parkinson's                                                                                                                                                                                                                                                                                                                                                                     | Q_DIAG_PARKINSONS   |
| Pulmonary hypertension                                                                                                                                                                                                                                                                                                                                                          | Q_DIAG_PULM_HYPER   |
| Pulmonary rare                                                                                                                                                                                                                                                                                                                                                                  | Q_DIAG_PULM_RARE    |
| Peripheral vascular disease                                                                                                                                                                                                                                                                                                                                                     | Q_DIAG_PVD          |
| Rheumatoid arthritis or SLE                                                                                                                                                                                                                                                                                                                                                     | Q_DIAG_RA_SLE       |
| Respiratory cancer                                                                                                                                                                                                                                                                                                                                                              | Q_DIAG_RESP_CANCER  |
| Severe mental illness                                                                                                                                                                                                                                                                                                                                                           | Q_DIAG_MENT_ILL     |
| Sickle cell disease                                                                                                                                                                                                                                                                                                                                                             | Q_DIAG_SICKLE_CELL  |
| Stroke/TIA                                                                                                                                                                                                                                                                                                                                                                      | Q_DIAG_STROKE       |
| Thrombosis or pulmonary embolus                                                                                                                                                                                                                                                                                                                                                 | Q_DIAG_VTE          |
| Care housing category                                                                                                                                                                                                                                                                                                                                                           | Q_HOME_CAT          |
| Learning disability or Down's                                                                                                                                                                                                                                                                                                                                                   | Q_LEARN_CAT         |
| Kidney disease                                                                                                                                                                                                                                                                                                                                                                  | Q_DIAG_CKD_LEVEL    |
| More information on codes: <a href="https://github.com/EAVE-II/EAVE-II-data-dictionary">https://github.com/EAVE-II/EAVE-II-data-dictionary</a><br>Ref: Clift, A.K., et al. Living risk prediction algorithm (QCovid) for risk of hospital admission and mortality from coronavirus 19 in adults: national derivation and validation cohort study. <i>BMJ</i> 371, m3731 (2020). |                     |

**Table S6: Study population for test-negative case-control design in Scotland**

| Characteristic     | Level            | Negative tests (%) | Positive tests (%) | Unvaccinated (%) | Vaccinated (%) | ChAdOx1       |
|--------------------|------------------|--------------------|--------------------|------------------|----------------|---------------|
| Age                | Mean (SD)        | 41.3 (15.9)        | 40.9 (16.2)        | 26.8 (7.7)       | 42.2 (16.0)    | 50.0 (13.8)   |
| Sex                | Female           | 126994 (56.5)      | 73962 (50.4)       | 11936 (45.7)     | 188930 (54.7)  | 86723 (53.7)  |
|                    | Male             | 97747 (43.5)       | 72693 (49.6)       | 14194 (54.3)     | 156162 (45.3)  | 74838 (46.3)  |
| Deprivation        | 1 - High         | 42697 (19.6)       | 30474 (21.4)       | 5293 (21.4)      | 67850 (20.2)   | 32570 (20.6)  |
|                    | 2                | 43150 (19.8)       | 29449 (20.7)       | 4965 (20.1)      | 67599 (20.1)   | 32426 (20.5)  |
|                    | 3                | 40436 (18.5)       | 25610 (18.0)       | 4408 (17.8)      | 61604 (18.3)   | 29105 (18.4)  |
|                    | 4                | 43572 (20.0)       | 27128 (19.0)       | 4597 (18.6)      | 66071 (19.7)   | 30662 (19.4)  |
|                    | 5-Low            | 46922 (21.5)       | 28996 (20.3)       | 5216 (21.1)      | 70659 (21.0)   | 32515 (20.6)  |
|                    | Missing          | 1364 (0.6)         | 881 (0.6)          | 232 (0.9)        | 2011 (0.6)     | 788 (0.5)     |
| Smoking status     | Non-smoker       | 104748 (49.0)      | 70452 (50.4)       | 11938 (49.3)     | 163166 (49.6)  | 74611 (48.1)  |
|                    | Ex-smoker        | 26003 (12.2)       | 16966 (12.1)       | 1378 (5.7)       | 41565 (12.6)   | 24710 (15.9)  |
|                    | Smoker           | 47367 (22.2)       | 27890 (19.9)       | 2964 (12.3)      | 72260 (21.9)   | 41627 (26.8)  |
|                    | Unknown          | 35677 (16.7)       | 24538 (17.5)       | 7914 (32.7)      | 52284 (15.9)   | 14272 (9.2)   |
| Blood pressure     | No Investigation | 50601 (23.7)       | 34581 (24.7)       | 10990 (45.4)     | 74158 (22.5)   | 20177 (13.0)  |
|                    | Low              | 3847 (1.8)         | 2475 (1.8)         | 522 (2.2)        | 5799 (1.8)     | 2381 (1.5)    |
|                    | Normal           | 137966 (64.5)      | 88764 (63.5)       | 11843 (49.0)     | 214767 (65.2)  | 110031 (70.9) |
|                    | High             | 17903 (8.4)        | 11758 (8.4)        | 740 (3.1)        | 28907 (8.8)    | 18751 (12.1)  |
|                    | Very High        | 3478 (1.6)         | 2268 (1.6)         | 99 (0.4)         | 5644 (1.7)     | 3880 (2.5)    |
| QRisk AF           | 0                | 211732 (99.0)      | 138386 (99.0)      | 24185 (100.0)    | 325761 (98.9)  | 152739 (98.4) |
|                    | 1                | 2063 (1.0)         | 1460 (1.0)         | 9 (0.0)          | 3514 (1.1)     | 2481 (1.6)    |
| QRisk Asthma       | 0                | 177966 (83.2)      | 118103 (84.5)      | 20713 (85.6)     | 275206 (83.6)  | 128671 (82.9) |
|                    | 1                | 35829 (16.8)       | 21743 (15.5)       | 3481 (14.4)      | 54069 (16.4)   | 26549 (17.1)  |
| QRisk blood cancer | 0                | 213085 (99.7)      | 139436 (99.7)      | 24191 (100.0)    | 328158 (99.7)  | 154442 (99.5) |

|                                |   |               |               |               |               |               |
|--------------------------------|---|---------------|---------------|---------------|---------------|---------------|
|                                | 1 | 710 (0.3)     | 410 (0.3)     | 3 (0.0)       | 1117 (0.3)    | 778 (0.5)     |
| QRisk CCF                      | 0 | 212904 (99.6) | 139209 (99.5) | 24190 (100.0) | 327751 (99.5) | 154081 (99.3) |
|                                | 1 | 891 (0.4)     | 637 (0.5)     | 4 (0.0)       | 1524 (0.5)    | 1139 (0.7)    |
| QRisk cerebral palsy           | 0 | 213584 (99.9) | 139720 (99.9) | 24188 (100.0) | 328944 (99.9) | 154964 (99.8) |
|                                | 1 | 211 (0.1)     | 126 (0.1)     | 6 (0.0)       | 331 (0.1)     | 256 (0.2)     |
| QRisk CHD                      | 0 | 209018 (97.8) | 136630 (97.7) | 24187 (100.0) | 321289 (97.6) | 149626 (96.4) |
|                                | 1 | 4777 (2.2)    | 3216 (2.3)    | 7 (0.0)       | 7986 (2.4)    | 5594 (3.6)    |
| QRisk cirrhosis                | 0 | 213012 (99.6) | 139299 (99.6) | 24183 (100.0) | 327956 (99.6) | 154334 (99.4) |
|                                | 1 | 783 (0.4)     | 547 (0.4)     | 11 (0.0)      | 1319 (0.4)    | 886 (0.6)     |
| QRisk congenital heart disease | 0 | 212173 (99.2) | 138756 (99.2) | 24166 (99.9)  | 326591 (99.2) | 153268 (98.7) |
|                                | 1 | 1622 (0.8)    | 1090 (0.8)    | 28 (0.1)      | 2684 (0.8)    | 1952 (1.3)    |
| QRisk COPD                     | 0 | 210012 (98.2) | 137920 (98.6) | 24182 (100.0) | 323578 (98.3) | 151077 (97.3) |
|                                | 1 | 3783 (1.8)    | 1926 (1.4)    | 12 (0.0)      | 5697 (1.7)    | 4143 (2.7)    |
| QRisk dementia                 | 0 | 213606 (99.9) | 139708 (99.9) | 24194 (100.0) | 328948 (99.9) | 154973 (99.8) |
|                                | 1 | 189 (0.1)     | 138 (0.1)     | 0 (0.0)       | 327 (0.1)     | 247 (0.2)     |
| QRisk type 1 diabetes          | 0 | 212625 (99.5) | 139016 (99.4) | 24184 (100.0) | 327285 (99.4) | 153684 (99.0) |
|                                | 1 | 1170 (0.5)    | 830 (0.6)     | 10 (0.0)      | 1990 (0.6)    | 1536 (1.0)    |
| QRisk type 2 diabetes          | 0 | 206492 (96.6) | 134401 (96.1) | 24150 (99.8)  | 316571 (96.1) | 146157 (94.2) |
|                                | 1 | 7303 (3.4)    | 5445 (3.9)    | 44 (0.2)      | 12704 (3.9)   | 9063 (5.8)    |
| QRisk epilepsy                 | 0 | 211085 (98.7) | 138151 (98.8) | 24130 (99.7)  | 324934 (98.7) | 151752 (97.8) |
|                                | 1 | 2710 (1.3)    | 1695 (1.2)    | 64 (0.3)      | 4341 (1.3)    | 3468 (2.2)    |
| QRisk fracture                 | 0 | 205561 (96.1) | 134403 (96.1) | 23338 (96.5)  | 316456 (96.1) | 148988 (96.0) |
|                                | 1 | 8234 (3.9)    | 5443 (3.9)    | 856 (3.5)     | 12819 (3.9)   | 6232 (4.0)    |
| QRisk neurological condition   | 0 | 213113 (99.7) | 139415 (99.7) | 24191 (100.0) | 328165 (99.7) | 154379 (99.5) |
|                                | 1 | 682 (0.3)     | 431 (0.3)     | 3 (0.0)       | 1110 (0.3)    | 841 (0.5)     |

|                              |   |               |               |               |               |               |
|------------------------------|---|---------------|---------------|---------------|---------------|---------------|
| QRisk Parkinsons             | 0 | 213645 (99.9) | 139772 (99.9) | 24193 (100.0) | 329052 (99.9) | 155046 (99.9) |
|                              | 1 | 150 (0.1)     | 74 (0.1)      | 1 (0.0)       | 223 (0.1)     | 174 (0.1)     |
| QRisk pulmonary hypertension | 0 | 213641 (99.9) | 139736 (99.9) | 24194 (100.0) | 329011 (99.9) | 155012 (99.9) |
|                              | 1 | 154 (0.1)     | 110 (0.1)     | 0 (0.0)       | 264 (0.1)     | 208 (0.1)     |
| QRisk rare pulmonary disease | 0 | 213039 (99.6) | 139403 (99.7) | 24189 (100.0) | 328081 (99.6) | 154352 (99.4) |
|                              | 1 | 756 (0.4)     | 443 (0.3)     | 5 (0.0)       | 1194 (0.4)    | 868 (0.6)     |
| QRisk PVD                    | 0 | 212998 (99.6) | 139355 (99.6) | 24185 (100.0) | 327996 (99.6) | 154328 (99.4) |
|                              | 1 | 797 (0.4)     | 491 (0.4)     | 9 (0.0)       | 1279 (0.4)    | 892 (0.6)     |
| QRisk rheumatoid conditions  | 0 | 211878 (99.1) | 138649 (99.1) | 24176 (99.9)  | 326179 (99.1) | 152978 (98.6) |
|                              | 1 | 1917 (0.9)    | 1197 (0.9)    | 18 (0.1)      | 3096 (0.9)    | 2242 (1.4)    |
| QRisk Respiratory cancer     | 0 | 213590 (99.9) | 139701 (99.9) | 24193 (100.0) | 328926 (99.9) | 154957 (99.8) |
|                              | 1 | 205 (0.1)     | 145 (0.1)     | 1 (0.0)       | 349 (0.1)     | 263 (0.2)     |
| QRisk Severe Mental illness  | 0 | 185874 (86.9) | 124625 (89.1) | 22750 (94.0)  | 287602 (87.3) | 130149 (83.8) |
|                              | 1 | 27921 (13.1)  | 15221 (10.9)  | 1444 (6.0)    | 41673 (12.7)  | 25071 (16.2)  |
| QRisk Sickle Cell            | 0 | 213638 (99.9) | 139763 (99.9) | 24193 (100.0) | 329036 (99.9) | 155057 (99.9) |
|                              | 1 | 157 (0.1)     | 83 (0.1)      | 1 (0.0)       | 239 (0.1)     | 163 (0.1)     |
| QRisk Stroke                 | 0 | 211334 (98.8) | 138191 (98.8) | 24178 (99.9)  | 325175 (98.8) | 152334 (98.1) |
|                              | 1 | 2461 (1.2)    | 1655 (1.2)    | 16 (0.1)      | 4100 (1.2)    | 2886 (1.9)    |
| QRisk VTE                    | 0 | 211740 (99.0) | 138407 (99.0) | 24172 (99.9)  | 325803 (98.9) | 152582 (98.3) |
|                              | 1 | 2055 (1.0)    | 1439 (1.0)    | 22 (0.1)      | 3472 (1.1)    | 2638 (1.7)    |
| QRisk care home              | 0 | 213568 (99.9) | 139719 (99.9) | 24172 (99.9)  | 328943 (99.9) | 155001 (99.9) |
|                              | 1 | 99 (0.0)      | 56 (0.0)      | 5 (0.0)       | 150 (0.0)     | 111 (0.1)     |
|                              | 2 | 128 (0.1)     | 71 (0.1)      | 17 (0.1)      | 182 (0.1)     | 108 (0.1)     |
| QRisk Learning difficulties  | 0 | 210870 (98.6) | 138287 (98.9) | 23885 (98.7)  | 325101 (98.7) | 152866 (98.5) |
|                              | 1 | 2868 (1.3)    | 1543 (1.1)    | 309 (1.3)     | 4101 (1.2)    | 2298 (1.5)    |

|                                                                                                                                            |                             |               |              |              |               |              |
|--------------------------------------------------------------------------------------------------------------------------------------------|-----------------------------|---------------|--------------|--------------|---------------|--------------|
|                                                                                                                                            | 2                           | 57 (0.0)      | 16 (0.0)     | 0 (0.0)      | 73 (0.0)      | 56 (0.0)     |
| QRisk CKD                                                                                                                                  | Mean (SD)                   | 0.0 (0.4)     | 0.0 (0.4)    | 0.0 (0.0)    | 0.0 (0.4)     | 0.1 (0.5)    |
| QRisk no. of risk groups                                                                                                                   | 0                           | 132028 (61.8) | 89184 (63.8) | 18534 (76.6) | 202551 (61.5) | 83199 (53.6) |
|                                                                                                                                            | 1                           | 59275 (27.7)  | 37396 (26.7) | 4995 (20.6)  | 91636 (27.8)  | 48434 (31.2) |
|                                                                                                                                            | 2                           | 16267 (7.6)   | 9513 (6.8)   | 606 (2.5)    | 25169 (7.6)   | 16410 (10.6) |
|                                                                                                                                            | 3                           | 4238 (2.0)    | 2495 (1.8)   | 53 (0.2)     | 6680 (2.0)    | 4761 (3.1)   |
|                                                                                                                                            | 4                           | 1330 (0.6)    | 814 (0.6)    | 4 (0.0)      | 2140 (0.6)    | 1572 (1.0)   |
|                                                                                                                                            | 5+                          | 657 (0.3)     | 444 (0.3)    | 2 (0.0)      | 1099 (0.3)    | 844 (0.5)    |
| BMI                                                                                                                                        | Mean (SD)                   | 27.5 (4.4)    | 27.5 (4.3)   | 26.0 (3.1)   | 27.6 (4.4)    | 28.4 (4.7)   |
| Health board                                                                                                                               | NHS AYRSHIRE & ARRAN        | 14860 (6.6)   | 9939 (6.8)   | 1661 (6.4)   | 23138 (6.7)   | 10654 (6.6)  |
|                                                                                                                                            | NHS BORDERS                 | 3504 (1.6)    | 1980 (1.4)   | 354 (1.4)    | 5130 (1.5)    | 2437 (1.5)   |
|                                                                                                                                            | NHS DUMFRIES & GALLOWAY     | 4526 (2.0)    | 2769 (1.9)   | 288 (1.1)    | 7007 (2.0)    | 3722 (2.3)   |
|                                                                                                                                            | NHS FIFE                    | 14413 (6.4)   | 9567 (6.5)   | 1517 (5.8)   | 22463 (6.5)   | 11009 (6.8)  |
|                                                                                                                                            | NHS FORTH VALLEY            | 12603 (5.6)   | 8035 (5.5)   | 1117 (4.3)   | 19521 (5.7)   | 9924 (6.1)   |
|                                                                                                                                            | NHS GRAMPIAN                | 18885 (8.4)   | 9952 (6.8)   | 1576 (6.0)   | 27243 (7.9)   | 12018 (7.4)  |
|                                                                                                                                            | NHS GREATER GLASGOW & CLYDE | 56335 (25.1)  | 38310 (26.1) | 6908 (26.5)  | 87636 (25.4)  | 37114 (23.0) |
|                                                                                                                                            | NHS HIGHLAND                | 10727 (4.8)   | 6065 (4.1)   | 1171 (4.5)   | 15621 (4.5)   | 7156 (4.4)   |
|                                                                                                                                            | NHS LANARKSHIRE             | 32416 (14.4)  | 22529 (15.4) | 2501 (9.6)   | 52443 (15.2)  | 28016 (17.3) |
|                                                                                                                                            | NHS Lothian                 | 41113 (18.3)  | 26309 (17.9) | 6544 (25.1)  | 60824 (17.6)  | 28377 (17.6) |
|                                                                                                                                            | NHS ORKNEY                  | 244 (0.1)     | 98 (0.1)     | 4 (0.0)      | 338 (0.1)     | 128 (0.1)    |
|                                                                                                                                            | NHS SHETLAND                | 198 (0.1)     | 20 (0.0)     | 4 (0.0)      | 214 (0.1)     | 10835 (6.7)  |
|                                                                                                                                            | NHS TAYSIDE                 | 14764 (6.6)   | 10986 (7.5)  | 2461 (9.4)   | 23289 (6.8)   | 96 (0.1)     |
|                                                                                                                                            | NHS WESTERN ISLES           | 54 (0.0)      | 34 (0.0)     | 7 (0.0)      | 81 (0.0)      | 20 (0.0)     |
| In QRisk Learning difficulties condition category 2 refers to Down's syndrome; In QRisk Care home condition, category 2 refers to homeless |                             |               |              |              |               |              |

**Table S7: Study population for test-negative design case-control study in Brazil**

| Patient characteristic                          |            | Negative tests (%) | Positive tests (%) | Unvaccinated (%)  | Vaccinated (%)    | ChAdOx1           |
|-------------------------------------------------|------------|--------------------|--------------------|-------------------|-------------------|-------------------|
| Age                                             | Mean (SD)  | 37 (16.3)          | 40 (17.0)          | 36 (14.8)         | 46 (20)           | 49 (16.3)         |
| Sex                                             | Female     | 4,250,817 (55.6%)  | 3,291,203 (51.9%)  | 5,070,090 (51.5%) | 2,471,930 (59.7%) | 1,133,682 (59.0%) |
|                                                 | Male       | 3,399,407 (44.4%)  | 3,050,015 (48.1%)  | 4,781,963 (48.5%) | 1,667,459 (40.3%) | 788,401 (41.0%)   |
| Deprivation                                     | 1 - High   | 2,527,084 (33.0%)  | 1,723,330 (27.2%)  | 2,876,866 (29.2%) | 1,373,548 (33.2%) | 640,017 (33.3%)   |
|                                                 | 2          | 1,700,287 (22.2%)  | 1,335,704 (21.1%)  | 2,116,290 (21.5%) | 919,701 (22.2%)   | 400,943 (20.9%)   |
|                                                 | 3          | 1,384,119 (18.1%)  | 1,356,698 (21.4%)  | 1,985,735 (20.2%) | 755,082 (18.2%)   | 354,339 (18.4%)   |
|                                                 | 4          | 1,321,997 (17.3%)  | 1,211,384 (19.1%)  | 1,828,837 (18.6%) | 704,544 (17.0%)   | 339,974 (17.7%)   |
|                                                 | 5-Low      | 712,310 (9.3%)     | 698,669 (11.0%)    | 1,031,381 (10.5%) | 379,598 (9.2%)    | 183,723 (9.6%)    |
|                                                 | Missing    | 4,427 (0.1%)       | 15,433 (0.2%)      | 12,944 (0.1%)     | 6,916 (0.2%)      | 3,087 (0.2%)      |
| Race                                            | White      | 3,297,385 (43.1%)  | 2,637,330 (41.6%)  | 4,071,164 (41.3%) | 1,863,551 (45.0%) | 866,076 (45.1%)   |
|                                                 | Black      | 295,935 (3.9%)     | 239,579 (3.8%)     | 388,846 (3.9%)    | 146,668 (3.5%)    | 67,278 (3.5%)     |
|                                                 | Asian      | 92,686 (1.2%)      | 82,222 (1.3%)      | 127,079 (1.3%)    | 47,829 (1.2%)     | 20,830 (1.1%)     |
|                                                 | Mixed Race | 2,139,858 (28.0%)  | 1,969,576 (31.1%)  | 2,994,519 (30.4%) | 1,114,915 (26.9%) | 520,838 (27.1%)   |
|                                                 | Indigenous | 8,610 (0.1%)       | 4,827 (0.1%)       | 4,673 (0.0%)      | 8,764 (0.2%)      | 571 (0.0%)        |
|                                                 | Missing    | 1,815,750 (23.7%)  | 1,407,684 (22.2%)  | 2,265,772 (23.0%) | 957,662 (23.1%)   | 446,490 (23.2%)   |
| <i>Diabetes Mellitus</i>                        | Present    | 212,075 (2.8%)     | 302,729 (4.8%)     | 268,729 (2.7%)    | 246,075 (5.9%)    | 119,201 (6.2%)    |
| Obesity                                         | Present    | 73,562 (1.0%)      | 134,155 (2.1%)     | 138,651 (1.4%)    | 69,066 (1.7%)     | 35,222 (1.8%)     |
| Immunosuppression                               | Present    | 43,928 (0.6%)      | 40,561 (0.6%)      | 49,957 (0.5%)     | 34,532 (0.8%)     | 17,790 (0.9%)     |
| Cardiac disease                                 | Present    | 390,228 (5.1%)     | 495,979 (7.8%)     | 485,663 (4.9%)    | 400,544 (9.7%)    | 189,360 (9.9%)    |
| Puerperal period (up to 45 days after delivery) | Present    | 4,237 (0.1%)       | 3,624 (0.1%)       | 6,187 (0.1%)      | 1,674 (0.0%)      | 306 (0.0%)        |
| Pregnancy                                       | Present    | 60,785 (0.8%)      | 31,179 (0.5%)      | 71,561 (0.7%)     | 20,403 (0.5%)     | 2,419 (0.1%)      |
| Chronic kidney disease                          | Present    | 22,637 (0.3%)      | 32,166 (0.5%)      | 29,698 (0.3%)     | 25,105 (0.6%)     | 10,971 (0.6%)     |



**Table S8: Rate ratios for severe COVID-19 (i.e. COVID-19 hospitalisation or death) over time since completing two ChAdOx1 doses in Scotland for: a) Overall adult population; b) Stratified by age group**

| Follow-up period (weeks post second dose) | Person-years | Number of events | RR (95% CI)        |
|-------------------------------------------|--------------|------------------|--------------------|
| <b>Overall</b>                            |              |                  |                    |
| 0 to 1                                    | 44,978       | 78               | 1.24 (0.91-1.69)   |
| 2 to 3                                    | 52,718       | 84               | Ref                |
| 4 to 5                                    | 63,161       | 100              | 0.87 (0.65-1.16)   |
| 6 to 7                                    | 68,874       | 134              | 1.02 (0.77-1.35)   |
| 8 to 9                                    | 71,541       | 245              | 1.81 (1.40-2.35)   |
| 10 to 11                                  | 71,093       | 280              | 2.01 (1.54-2.62)   |
| 12 to 13                                  | 68,520       | 336              | 2.52 (1.92-3.32)   |
| 14 to 15                                  | 64,495       | 353              | 3.01 (2.26-3.99)   |
| 16 to 17                                  | 60,849       | 397              | 4.01 (2.99-5.38)   |
| 18 to 19                                  | 51,211       | 497              | 5.43 (4.00-7.38)   |
| 20 to 21                                  | 37,526       | 567              | 7.39 (5.37-10.18)  |
| <b>18-64 years old</b>                    |              |                  |                    |
| 0 to 1                                    | 43,935       | 73               | 1.17 (0.84-1.64)   |
| 2 to 3                                    | 47,879       | 69               | Ref                |
| 4 to 5                                    | 49,813       | 75               | 0.94 (0.67-1.31)   |
| 6 to 7                                    | 50,130       | 84               | 1.04 (0.75-1.46)   |
| 8 to 9                                    | 49,969       | 130              | 1.94 (1.40-2.69)   |
| 10 to 11                                  | 49,275       | 136              | 2.40 (1.71-3.37)   |
| 12 to 13                                  | 46,714       | 151              | 2.74 (1.93-3.91)   |
| 14 to 15                                  | 42,721       | 196              | 3.75 (2.61-5.38)   |
| 16 to 17                                  | 39,148       | 212              | 5.18 (3.57-7.52)   |
| 18 to 19                                  | 29,636       | 201              | 7.51 (5.10-11.04)  |
| 20 to 21                                  | 16,176       | 158              | 11.11 (7.41-16.65) |
| <b>65-79 years old</b>                    |              |                  |                    |
| 0 to 1                                    | 935          | †                | 0.59 (0.17-2.08)   |
| 2 to 3                                    | 4,484        | 13               | Ref                |
| 4 to 5                                    | 11,061       | 15               | 0.44 (0.20-0.93)   |
| 6 to 7                                    | 13,522       | 32               | 0.52 (0.26-1.05)   |
| 8 to 9                                    | 14,113       | 76               | 0.78 (0.40-1.52)   |
| 10 to 11                                  | 14,142       | 79               | 0.63 (0.31-1.24)   |
| 12 to 13                                  | 14,119       | 91               | 0.84 (0.42-1.69)   |
| 14 to 15                                  | 14,088       | 83               | 0.93 (0.45-1.93)   |
| 16 to 17                                  | 14,028       | 105              | 0.88 (0.41-1.87)   |
| 18 to 19                                  | 13,924       | 194              | 1.07 (0.50-2.31)   |
| 20 to 21                                  | 13,724       | 210              | 1.13 (0.51-2.49)   |

| 80+ years old |       |     |                   |
|---------------|-------|-----|-------------------|
| 0 to 1        | 109   | †   | 1.84 (0.26-13.12) |
| 2 to 3        | 354   | †   | Ref               |
| 4 to 5        | 2,287 | 10  | 1.65 (0.36-7.61)  |
| 6 to 7        | 5,221 | 18  | 1.12 (0.26-4.88)  |
| 8 to 9        | 7,459 | 39  | 1.10 (0.26-4.61)  |
| 10 to 11      | 7,676 | 65  | 1.02 (0.24-4.24)  |
| 12 to 13      | 7,687 | 94  | 1.09 (0.26-4.54)  |
| 14 to 15      | 7,686 | 74  | 0.87 (0.21-3.64)  |
| 16 to 17      | 7,674 | 80  | 1.16 (0.27-4.93)  |
| 18 to 19      | 7,651 | 102 | 1.19 (0.28-5.14)  |
| 20 to 21      | 7,627 | 199 | 1.53 (0.35-6.63)  |

\*Adjusted for age, sex, deprivation, comorbidities, number of previous tests, interval between doses and temporal trend.

†Values suppressed due to small numbers

**Table S9: Rate ratios for confirmed SARS-CoV-2 symptomatic infections over time since completing two doses in Scotland for: a) Overall adult population; b) Stratified by age group**

| Follow-up period (weeks post second dose) | Person-years | Number of events | RR (95% CI)      |
|-------------------------------------------|--------------|------------------|------------------|
| <b>Overall</b>                            |              |                  |                  |
| 0 to 1                                    | 47,415       | 2,034            | 1.36 (1.28-1.44) |
| 2 to 3                                    | 55,478       | 2,350            | Ref              |
| 4 to 5                                    | 65,955       | 3,294            | 0.97 (0.92-1.03) |
| 6 to 7                                    | 71,388       | 4,146            | 1.06 (1.01-1.12) |
| 8 to 9                                    | 73,762       | 4,472            | 1.09 (1.04-1.15) |
| 10 to 11                                  | 73,204       | 6,136            | 1.20 (1.14-1.27) |
| 12 to 13                                  | 71,396       | 7,527            | 1.24 (1.17-1.31) |
| 14 to 15                                  | 67,446       | 7,074            | 1.22 (1.16-1.30) |
| 16 to 17                                  | 63,336       | 6,044            | 1.24 (1.17-1.32) |
| 18 to 19                                  | 57,492       | 5,520            | 1.34 (1.26-1.43) |
| 20 to 21                                  | 44,615       | 3,860            | 1.39 (1.29-1.48) |
| <b>18-64 years old</b>                    |              |                  |                  |
| 0 to 1                                    | 46,241       | 2,030            | 1.35 (1.27-1.44) |
| 2 to 3                                    | 49,927       | 2,333            | Ref              |
| 4 to 5                                    | 51,654       | 3,255            | 0.99 (0.94-1.05) |
| 6 to 7                                    | 51,743       | 4,048            | 1.10 (1.05-1.17) |
| 8 to 9                                    | 51,394       | 4,256            | 1.16 (1.10-1.23) |
| 10 to 11                                  | 50,650       | 5,791            | 1.27 (1.20-1.34) |
| 12 to 13                                  | 48,875       | 7,176            | 1.31 (1.24-1.39) |
| 14 to 15                                  | 44,976       | 6,691            | 1.31 (1.24-1.39) |
| 16 to 17                                  | 40,948       | 5,409            | 1.36 (1.27-1.44) |
| 18 to 19                                  | 35,263       | 4,488            | 1.46 (1.37-1.56) |
| 20 to 21                                  | 22,631       | 2,781            | 1.46 (1.36-1.57) |
| <b>65-79 years old</b>                    |              |                  |                  |
| 0 to 1                                    | 46,241       | 2,030            | 1.35 (1.27-1.44) |
| 2 to 3                                    | 49,927       | 2,333            | Ref              |
| 4 to 5                                    | 51,654       | 3,255            | 0.99 (0.94-1.05) |
| 6 to 7                                    | 51,743       | 4,048            | 1.10 (1.05-1.17) |
| 8 to 9                                    | 51,394       | 4,256            | 1.16 (1.10-1.23) |
| 10 to 11                                  | 50,650       | 5,791            | 1.27 (1.20-1.34) |
| 12 to 13                                  | 48,875       | 7,176            | 1.31 (1.24-1.39) |
| 14 to 15                                  | 44,976       | 6,691            | 1.31 (1.24-1.39) |
| 16 to 17                                  | 40,948       | 5,409            | 1.36 (1.27-1.44) |
| 18 to 19                                  | 35,263       | 4,488            | 1.46 (1.37-1.56) |
| 20 to 21                                  | 22,631       | 2,781            | 1.46 (1.36-1.57) |
| <b>80+ years old</b>                      |              |                  |                  |

|          |        |     |                  |
|----------|--------|-----|------------------|
| 0 to 1   | 1,057  | †   | 0.75 (0.25-2.28) |
| 2 to 3   | 5,124  | 15  | Ref              |
| 4 to 5   | 11,761 | 34  | 0.85 (0.46-1.59) |
| 6 to 7   | 14,057 | 90  | 1.11 (0.61-2.00) |
| 8 to 9   | 14,617 | 196 | 1.17 (0.65-2.10) |
| 10 to 11 | 14,627 | 288 | 1.33 (0.74-2.38) |
| 12 to 13 | 14,588 | 272 | 1.52 (0.84-2.75) |
| 14 to 15 | 14,544 | 309 | 1.88 (1.03-3.42) |
| 16 to 17 | 14,476 | 566 | 2.05 (1.12-3.75) |
| 18 to 19 | 14,341 | 891 | 2.30 (1.25-4.24) |
| 20 to 21 | 14,135 | 791 | 2.42 (1.31-4.50) |

\*Adjusted for age, sex, deprivation, comorbidities, number of previous tests, interval between doses and temporal trend.

†Values suppressed due to small numbers

**Table S10: Trend test for: a) Overall adult population; b) Stratified by age group**

| Follow-up period (weeks post second dose) | Scotland       | Brazil   |
|-------------------------------------------|----------------|----------|
|                                           | <b>P-value</b> |          |
| <b>Overall</b>                            |                |          |
| 3-4 week +                                | <0.00001       | <0.00001 |
| 5-6 week +                                | <0.00001       | <0.00001 |
| 7-8 week +                                | <0.00001       | <0.00001 |
| <b>18-64 years old</b>                    |                |          |
| 3-4 week +                                | <0.00001       | <0.00001 |
| 5-6 week +                                | <0.00001       | <0.00001 |
| 7-8 week +                                | <0.00001       | <0.00001 |
| <b>65-79 years old</b>                    |                |          |
| 3-4 week +                                | 0.0051         | <0.00001 |
| 5-6 week +                                | 0.0113         | <0.00001 |
| 7-8 week +                                | 0.0265         | <0.00001 |
| <b>80+ years old</b>                      |                |          |
| 3-4 week +                                | 0.5523         | <0.00001 |
| 5-6 week +                                | 0.2362         | <0.00001 |
| 7-8 week +                                | 0.1559         | <0.00001 |

All analyses from fully adjusted models.

**Table S11: Rate ratios for COVID-19 hospitalisations over time since completing two ChAdOx1 doses in Scotland for the overall adult population**

| Follow-up period (weeks post second dose) | Person-years | Number of events | RR* (95% CI)      |
|-------------------------------------------|--------------|------------------|-------------------|
| 0 to 1                                    | 44,978       | 78               | 1.23 (0.90-1.68)  |
| 2 to 3                                    | 52,718       | 84               | Ref               |
| 4 to 5                                    | 63,161       | 99               | 0.87 (0.65-1.17)  |
| 6 to 7                                    | 68,874       | 131              | 1.02 (0.77-1.35)  |
| 8 to 9                                    | 71,541       | 243              | 1.88 (1.45-2.43)  |
| 10 to 11                                  | 71,093       | 276              | 2.11 (1.61-2.75)  |
| 12 to 13                                  | 68,520       | 315              | 2.55 (1.93-3.36)  |
| 14 to 15                                  | 64,495       | 345              | 3.20 (2.40-4.26)  |
| 16 to 17                                  | 60,849       | 370              | 4.12 (3.05-5.55)  |
| 18 to 19                                  | 51,211       | 464              | 5.65 (4.14-7.72)  |
| 20 to 21                                  | 37,526       | 521              | 7.72 (5.58-10.69) |

\* Adjusted for age, sex, deprivation, comorbidities, number of previous tests, interval between doses and temporal trend.

† Values suppressed due to small numbers

**Table S12: Rate ratios for COVID-19 death over time since completing two ChAdOx1 doses in Scotland for the overall adult population**

| Follow-up period (weeks post second dose) | Person-years | Number of events | RR* (95% CI)      |
|-------------------------------------------|--------------|------------------|-------------------|
| 0 to 1                                    | 59,377       | †                | 0.70 (0.14-3.62)  |
| 2 to 3                                    | 67,290       | 5                | Ref               |
| 4 to 5                                    | 71,449       | 6                | 0.79 (0.24-2.59)  |
| 6 to 7                                    | 72,343       | 10               | 0.98 (0.33-2.91)  |
| 8 to 9                                    | 72,136       | 18               | 1.37 (0.48-3.86)  |
| 10 to 11                                  | 71,683       | 38               | 2.26 (0.83-6.20)  |
| 12 to 13                                  | 70,212       | 64               | 3.58 (1.30-9.83)  |
| 14 to 15                                  | 66,543       | 54               | 3.27 (1.15-9.27)  |
| 16 to 17                                  | 62,692       | 71               | 5.00 (1.73-14.48) |
| 18 to 19                                  | 57,078       | 82               | 5.88 (1.97-17.52) |
| 20 to 21                                  | 44,270       | 134              | 9.32 (3.05-28.47) |

\* Adjusted for age, sex, deprivation, comorbidities, number of previous tests, interval between doses and temporal trend.

† Values suppressed due to small numbers

**Table S13: Rate ratios for severe COVID-19 (hospitalisation/death) over time since completing two ChAdOx1 doses in Brazil for: a) Overall adult population; b) Stratified by age group**

| Follow-up period (weeks post second dose) | Person-years | Number of events | RR (95% CI)      |
|-------------------------------------------|--------------|------------------|------------------|
| <b>Overall</b>                            |              |                  |                  |
| 0 to 1                                    | 1,565,461    | 2,531            | 1.85 (1.71-2.00) |
| 2 to 3                                    | 1,473,040    | 1,083            | Ref              |
| 4 to 5                                    | 1,321,841    | 1,013            | 1.23 (1.12-1.35) |
| 6 to 7                                    | 1,103,439    | 1,018            | 1.64 (1.48-1.82) |
| 8 to 9                                    | 851,489      | 861              | 1.80 (1.60-2.03) |
| 10 to 11                                  | 642,304      | 750              | 2.29 (2.01-2.61) |
| 12 to 13                                  | 439,999      | 644              | 2.95 (2.56-3.41) |
| 14 to 15                                  | 261,089      | 470              | 3.10 (2.63-3.64) |
| 16 to 17                                  | 167,191      | 395              | 3.90 (3.26-4.67) |
| 18 to 19                                  | 130,428      | 274              | 4.71 (3.83-5.78) |
| <b>18-64 years</b>                        |              |                  |                  |
| 0 to 1                                    | 1,383,537    | 1,271            | 1.99 (1.77-2.23) |
| 2 to 3                                    | 1,287,689    | 454              | Ref              |
| 4 to 5                                    | 1,137,024    | 448              | 1.40 (1.22-1.61) |
| 6 to 7                                    | 919,949      | 427              | 1.95 (1.67-2.27) |
| 8 to 9                                    | 670,186      | 277              | 2.04 (1.70-2.46) |
| 10 to 11                                  | 464,809      | 156              | 2.26 (1.80-2.83) |
| 12 to 13                                  | 272,090      | 85               | 2.92 (2.21-3.86) |
| 14 to 15                                  | 130,572      | 37               | 2.71 (1.87-3.92) |
| 16 to 17                                  | 70,249       | 27               | 3.32 (2.18-5.05) |
| 18 to 19                                  | 51,942       | 26               | 4.78 (3.11-7.35) |
| <b>65-79 years</b>                        |              |                  |                  |
| 0 to 1                                    | 126,333      | 488              | 1.62 (1.37-1.92) |
| 2 to 3                                    | 127,521      | 249              | Ref              |
| 4 to 5                                    | 126,911      | 217              | 1.10 (0.91-1.34) |
| 6 to 7                                    | 125,724      | 228              | 1.49 (1.20-1.84) |
| 8 to 9                                    | 123,769      | 222              | 1.82 (1.45-2.29) |
| 10 to 11                                  | 120,278      | 218              | 2.63 (2.06-3.36) |
| 12 to 13                                  | 111,174      | 189              | 3.61 (2.77-4.71) |
| 14 to 15                                  | 74,528       | 105              | 3.47 (2.54-4.74) |
| 16 to 17                                  | 41,800       | 82               | 4.90 (3.44-6.97) |
| 18 to 19                                  | 25,300       | 49               | 5.26 (3.45-8.01) |
| <b>80+ years</b>                          |              |                  |                  |
| 0 to 1                                    | 55,591       | 772              | 1.72 (1.48-2.00) |
| 2 to 3                                    | 57,829       | 380              | Ref              |
| 4 to 5                                    | 57,906       | 348              | 1.11 (0.94-1.32) |
| 6 to 7                                    | 57,766       | 363              | 1.37 (1.12-1.68) |
| 8 to 9                                    | 57,534       | 362              | 1.49 (1.18-1.87) |
| 10 to 11                                  | 57,217       | 376              | 1.82 (1.41-2.34) |
| 12 to 13                                  | 56,735       | 370              | 2.18 (1.66-2.87) |

|          |        |     |                  |
|----------|--------|-----|------------------|
| 14 to 15 | 55,989 | 328 | 2.46 (1.82-3.32) |
| 16 to 17 | 55,142 | 286 | 2.90 (2.08-4.04) |
| 18 to 19 | 53,185 | 199 | 3.44 (2.37-4.99) |

\* Adjusted for sex, age in 5 years band up to 80, deprivation status, macro-region of residence, calendar week, interval between doses and primary reason for vaccination.



**Table S14: Rate ratios for COVID-19 death over time since completing two ChAdOx1 doses in Brazil for the overall adult population**

| Follow-up period (weeks post second dose) | Person-years | Number of events | RR (95% CI)      |
|-------------------------------------------|--------------|------------------|------------------|
| 0 to 1                                    | 1,565,034    | 878              | 1.74 (1.52-1.99) |
| 2 to 3                                    | 1,472,503    | 388              | Ref              |
| 4 to 5                                    | 1,320,697    | 356              | 1.21 (1.04-1.42) |
| 6 to 7                                    | 1,102,505    | 369              | 1.63 (1.37-1.95) |
| 8 to 9                                    | 851,876      | 312              | 1.77 (1.44-2.17) |
| 10 to 11                                  | 642,456      | 288              | 2.32 (1.85-2.91) |
| 12 to 13                                  | 438,577      | 246              | 2.80 (2.18-3.60) |
| 14 to 15                                  | 260,208      | 186              | 2.95 (2.21-3.94) |
| 16 to 17                                  | 166,882      | 132              | 3.59 (2.58-5.00) |
| 18 to 19                                  | 130,548      | 83               | 4.80 (3.25-7.08) |

**Table S15: Rate ratios for confirmed symptomatic SARS-CoV-2 infections over time since completing two ChAdOx1 doses in Brazil, overall and age-stratified**

| Follow-up period (weeks post second dose) | Person-years | Number of events | RR* (95% CI)     |
|-------------------------------------------|--------------|------------------|------------------|
| <b>Overall</b>                            |              |                  |                  |
| 0 to 1                                    | 1,629,924    | 28,781           | 1.31 (1.29-1.34) |
| 2 to 3                                    | 1,525,929    | 17,926           | Ref              |
| 4 to 5                                    | 1,350,928    | 15,497           | 1.13 (1.11-1.16) |
| 6 to 7                                    | 1,106,456    | 12,279           | 1.29 (1.25-1.32) |
| 8 to 9                                    | 851,751      | 9,337            | 1.45 (1.41-1.50) |
| 10 to 11                                  | 642,038      | 7,070            | 1.66 (1.60-1.72) |
| 12 to 13                                  | 438,953      | 5,124            | 1.87 (1.80-1.94) |
| 14 to 15                                  | 260,605      | 3,354            | 1.86 (1.78-1.94) |
| 16 to 17                                  | 166,992      | 2,536            | 2.04 (1.95-2.14) |
| 18 to 19                                  | 130,039      | 1,851            | 2.18 (2.06-2.30) |
| <b>18-64 years</b>                        |              |                  |                  |
| 0 to 1                                    | 1,448,103    | 23,898           | 1.30 (1.27-1.33) |
| 2 to 3                                    | 1,340,491    | 14,996           | Ref              |
| 4 to 5                                    | 1,166,182    | 12,906           | 1.14 (1.11-1.17) |
| 6 to 7                                    | 923,192      | 9,805            | 1.28 (1.24-1.31) |
| 8 to 9                                    | 670,641      | 7,009            | 1.45 (1.41-1.50) |
| 10 to 11                                  | 464,887      | 4,807            | 1.62 (1.56-1.69) |
| 12 to 13                                  | 271,635      | 3,199            | 1.78 (1.70-1.86) |
| 14 to 15                                  | 130,971      | 1,977            | 1.74 (1.65-1.83) |
| 16 to 17                                  | 70,705       | 1,438            | 1.86 (1.76-1.97) |
| 18 to 19                                  | 52,068       | 1,202            | 2.11 (1.98-2.25) |
| <b>65-79 years</b>                        |              |                  |                  |
| 0 to 1                                    | 121,768      | 2,502            | 1.33 (1.24-1.43) |
| 2 to 3                                    | 122,884      | 1,526            | Ref              |
| 4 to 5                                    | 122,131      | 1,348            | 1.13 (1.05-1.23) |
| 6 to 7                                    | 120,835      | 1,301            | 1.43 (1.31-1.57) |
| 8 to 9                                    | 118,906      | 1,216            | 1.67 (1.51-1.84) |
| 10 to 11                                  | 115,368      | 1,086            | 2.09 (1.87-2.33) |
| 12 to 13                                  | 106,133      | 855              | 2.58 (2.29-2.91) |
| 14 to 15                                  | 69,336       | 507              | 2.79 (2.43-3.21) |
| 16 to 17                                  | 37,063       | 326              | 3.42 (2.91-4.03) |
| 18 to 19                                  | 20,977       | 151              | 3.08 (2.49-3.81) |
| <b>80+ years</b>                          |              |                  |                  |
| 0 to 1                                    | 55,626       | 2,227            | 1.40 (1.28-1.52) |
| 2 to 3                                    | 58,027       | 1,318            | Ref              |
| 4 to 5                                    | 58,097       | 1,151            | 1.10 (1.00-1.21) |
| 6 to 7                                    | 57,932       | 1,102            | 1.35 (1.20-1.51) |
| 8 to 9                                    | 57,757       | 1,018            | 1.44 (1.27-1.65) |
| 10 to 11                                  | 57,397       | 1,066            | 1.80 (1.56-2.08) |
| 12 to 13                                  | 56,881       | 970              | 2.08 (1.77-2.45) |

|          |        |     |                  |
|----------|--------|-----|------------------|
| 14 to 15 | 56,131 | 803 | 2.23 (1.87-2.67) |
| 16 to 17 | 55,212 | 730 | 2.73 (2.24-3.32) |
| 18 to 19 | 53,245 | 473 | 2.82 (2.25-3.53) |

\* Adjusted for sex, age in 5 years band up to 80, deprivation status, macro-region of residence, calendar week, interval between doses and primary reason for vaccination.

**Table S16: Vaccine effectiveness estimates in Brazil, restricted to follow-up when presence of delta variant was minimal (sensitivity analysis)**

| Follow-up period (weeks post second dose) | ChAdOx1      |                  |                  |
|-------------------------------------------|--------------|------------------|------------------|
|                                           | Person-years | Number of Events | VE* (95% CI)     |
| 0 to 2 post-first dose                    | 1,749,528    | 23,845           | Ref              |
| Partially vaccinated†                     | 6,153,141    | 31,797           | 59.5 (58.6-60.3) |
| 0 to 1                                    | 384,334      | 1,379            | 71.9 (70.2-73.6) |
| 2 to 3                                    | 224,864      | 511              | 84.5 (83-85.9)   |
| 4 to 5                                    | 153,068      | 400              | 83.1 (81.2-84.7) |
| 6 to 7                                    | 122,680      | 358              | 76.4 (73.6-78.9) |
| 8 to 9                                    | 88,473       | 197              | 70.8 (66.2-74.8) |
| 10 to 11                                  | 55,337       | 95               | 67.5 (60-73.5)   |
| 12 to 13                                  | 30,550       | 28               | 61.5 (44-73.5)   |

\* Adjusted for sex, age in 5 years band up to 80, deprivation status, macro-region of residence, calendar week, interval between doses and primary reason for vaccination.

† Partially vaccinated: ≥2 weeks post-first dose and before second dose

**Table S17: Rate ratios for Covid-19 hospitalisations over time since completing two ChAdOx1 doses in Brazil for: a) Overall adult population; b) Stratified by age group**

| Follow-up period (weeks post second dose) | Person-years | Number of events | RR* (95% CI)     |
|-------------------------------------------|--------------|------------------|------------------|
| <b>Overall</b>                            |              |                  |                  |
| 0 to 1                                    | 1,585,306    | 2491             | 1.86 (1.72-2.02) |
| 2 to 3                                    | 1,491,714    | 1062             | Ref              |
| 4 to 5                                    | 1,338,600    | 997              | 1.23 (1.12-1.36) |
| 6 to 7                                    | 1,117,429    | 1010             | 1.66 (1.50-1.84) |
| 8 to 9                                    | 862,285      | 850              | 1.81 (1.61-2.04) |
| 10 to 11                                  | 650,448      | 745              | 2.31 (2.02-2.63) |
| 12 to 13                                  | 445,578      | 641              | 2.97 (2.57-3.43) |
| 14 to 15                                  | 264,399      | 468              | 3.12 (2.65-3.67) |
| 16 to 17                                  | 169,311      | 392              | 3.92 (3.27-4.70) |
| 18 to 19                                  | 132,081      | 271              | 4.71 (3.83-5.78) |
| <b>18-64 years</b>                        |              |                  |                  |
| 0 to 1                                    | 1,401,081    | 1258             | 1.98 (1.76-2.23) |
| 2 to 3                                    | 1,304,018    | 450              | Ref              |
| 4 to 5                                    | 1,151,443    | 444              | 1.40 (1.22-1.61) |
| 6 to 7                                    | 931,615      | 427              | 1.96 (1.68-2.29) |
| 8 to 9                                    | 678,685      | 276              | 2.05 (1.70-2.47) |
| 10 to 11                                  | 470,703      | 156              | 2.27 (1.81-2.86) |
| 12 to 13                                  | 275,541      | 84               | 2.92 (2.21-3.86) |
| 14 to 15                                  | 132,228      | 36               | 2.67 (1.84-3.89) |
| 16 to 17                                  | 71,140       | 27               | 3.36 (2.21-5.12) |
| 18 to 19                                  | 52,601       | 26               | 4.86 (3.16-7.48) |
| <b>65-79 years</b>                        |              |                  |                  |
| 0 to 1                                    | 127,933      | 480              | 1.64 (1.39-1.95) |
| 2 to 3                                    | 129,137      | 245              | Ref              |
| 4 to 5                                    | 128,519      | 213              | 1.09 (0.90-1.33) |
| 6 to 7                                    | 127,318      | 227              | 1.48 (1.20-1.83) |
| 8 to 9                                    | 125,338      | 219              | 1.79 (1.42-2.25) |
| 10 to 11                                  | 121,803      | 216              | 2.59 (2.03-3.32) |
| 12 to 13                                  | 112,584      | 189              | 3.57 (2.73-4.65) |
| 14 to 15                                  | 75,473       | 105              | 3.41 (2.49-4.67) |
| 16 to 17                                  | 42,330       | 82               | 4.79 (3.36-6.82) |
| 18 to 19                                  | 25,621       | 48               | 4.98 (3.26-7.61) |
| <b>80+ years</b>                          |              |                  |                  |
| 0 to 1                                    | 56,292       | 753              | 1.75 (1.50-2.04) |
| 2 to 3                                    | 58,559       | 367              | Ref              |
| 4 to 5                                    | 58,638       | 340              | 1.13 (0.95-1.34) |
| 6 to 7                                    | 58,496       | 356              | 1.41 (1.14-1.73) |
| 8 to 9                                    | 58,262       | 355              | 1.53 (1.21-1.93) |
| 10 to 11                                  | 57,941       | 373              | 1.87 (1.45-2.41) |
| 12 to 13                                  | 57,453       | 368              | 2.23 (1.69-2.95) |

|          |        |     |                  |
|----------|--------|-----|------------------|
| 14 to 15 | 56,698 | 327 | 2.53 (1.86-3.42) |
| 16 to 17 | 55,840 | 283 | 2.94 (2.10-4.11) |
| 18 to 19 | 53,860 | 197 | 3.49 (2.40-5.08) |

\* Adjusted for sex, age in 5 years band up to 80, deprivation status, macro-region of residence, calendar week, interval between doses and primary reason for vaccination.

**Table S18: Rate ratios for COVID-19 deaths over time since completing two ChAdOx1 doses in Brazil for: a) Overall adult population; b) Stratified by age group**

| Follow-up period (weeks post second dose) | Person-years | Number of events | RR (95% CI)       |
|-------------------------------------------|--------------|------------------|-------------------|
| <b>Overall</b>                            |              |                  |                   |
| 0 to 1                                    | 1,565,034    | 878              | 1.74 (1.52-1.99)  |
| 2 to 3                                    | 1,472,503    | 388              | Ref               |
| 4 to 5                                    | 1,320,697    | 356              | 1.21 (1.04-1.42)  |
| 6 to 7                                    | 1,102,505    | 369              | 1.63 (1.37-1.95)  |
| 8 to 9                                    | 851,876      | 312              | 1.77 (1.44-2.17)  |
| 10 to 11                                  | 642,456      | 288              | 2.32 (1.85-2.91)  |
| 12 to 13                                  | 438,577      | 246              | 2.80 (2.18-3.60)  |
| 14 to 15                                  | 260,208      | 186              | 2.95 (2.21-3.94)  |
| 16 to 17                                  | 166,882      | 132              | 3.59 (2.58-5.00)  |
| 18 to 19                                  | 130,548      | 83               | 4.80 (3.25-7.08)  |
| <b>18-64 years</b>                        |              |                  |                   |
| 0 to 1                                    | 1,384,870    | 277              | 1.74 (1.36-2.23)  |
| 2 to 3                                    | 1,288,906    | 104              | Ref               |
| 4 to 5                                    | 1,137,739    | 103              | 1.52 (1.13-2.04)  |
| 6 to 7                                    | 920,949      | 94               | 2.16 (1.54-3.03)  |
| 8 to 9                                    | 672,471      | 51               | 2.12 (1.39-3.26)  |
| 10 to 11                                  | 466,852      | 30               | 2.51 (1.48-4.25)  |
| 12 to 13                                  | 272,507      | 13               | 2.67 (1.34-5.33)  |
| 14 to 15                                  | 131,000      | 6                | 3.14 (1.27-7.75)  |
| 16 to 17                                  | 70,789       | 3                | 2.96 (0.88-10.02) |
| 18 to 19                                  | 52,201       | 1                | 1.74 (0.23-13.07) |
| <b>65-79 years</b>                        |              |                  |                   |
| 0 to 1                                    | 124,364      | 184              | 1.37 (1.05-1.79)  |
| 2 to 3                                    | 125,577      | 102              | Ref               |
| 4 to 5                                    | 124,835      | 86               | 1.03 (0.76-1.40)  |
| 6 to 7                                    | 123,613      | 81               | 1.23 (0.88-1.73)  |
| 8 to 9                                    | 121,701      | 87               | 1.87 (1.31-2.68)  |
| 10 to 11                                  | 118,267      | 78               | 2.58 (1.75-3.82)  |
| 12 to 13                                  | 109,247      | 62               | 3.47 (2.25-5.35)  |
| 14 to 15                                  | 73,131       | 37               | 3.47 (2.08-5.80)  |
| 16 to 17                                  | 40,830       | 24               | 4.50 (2.46-8.22)  |
| 18 to 19                                  | 25,095       | 9                | 3.57 (1.57-8.13)  |
| <b>80+ years</b>                          |              |                  |                   |
| 0 to 1                                    | 55,801       | 417              | 1.98 (1.62-2.42)  |
| 2 to 3                                    | 58,021       | 182              | Ref               |
| 4 to 5                                    | 58,123       | 167              | 1.13 (0.89-1.43)  |
| 6 to 7                                    | 57,943       | 194              | 1.53 (1.17-2.00)  |
| 8 to 9                                    | 57,703       | 174              | 1.57 (1.15-2.13)  |
| 10 to 11                                  | 57,337       | 180              | 2.06 (1.46-2.90)  |
| 12 to 13                                  | 56,823       | 171              | 2.43 (1.66-3.54)  |

|          |        |     |                  |
|----------|--------|-----|------------------|
| 14 to 15 | 56,078 | 143 | 2.70 (1.77-4.11) |
| 16 to 17 | 55,263 | 105 | 3.32 (2.07-5.33) |
| 18 to 19 | 53,253 | 73  | 5.30 (3.12-9.02) |

\* Adjusted for sex, age in 5 years band up to 80, deprivation status, macro-region of residence, calendar week, interval between doses and primary reason for vaccination.

†Values suppressed due to small numbers.



**Table S19: Vaccine effectiveness estimates for ChAdOx1 against hospitalisations or mortality by length of time since two-dose vaccination in Scotland (reference group: unvaccinated), stratified by age group**

| Follow-up period (weeks post second dose) | Person-years | Number of events | VE* (95% CI)       |
|-------------------------------------------|--------------|------------------|--------------------|
| <b>Overall</b>                            |              |                  |                    |
| Unvaccinated                              | 336,942      | 2,245            | 0.0 (0.0-0.0)      |
| 0 to 1 post-first dose                    | 6,860        | 39               | -15.4 (-60.6-17.0) |
| Partially vaccinated†                     | 94,761       | 420              | 49.3 (43.3-54.6)   |
| 0 to 1                                    | 47,252       | 78               | 77.7 (71.9-82.3)   |
| 2 to 3                                    | 55,318       | 85               | 83.7 (79.7-87.0)   |
| 4 to 5                                    | 65,698       | 106              | 86.6 (83.6-89.0)   |
| 6 to 7                                    | 71,120       | 134              | 86.8 (84.2-88.9)   |
| 8 to 9                                    | 73,540       | 245              | 79.0 (75.9-81.7)   |
| 10 to 11                                  | 73,212       | 280              | 79.6 (76.8-82.1)   |
| 12 to 13                                  | 71,773       | 337              | 77.4 (74.6-80.0)   |
| 14 to 15                                  | 68,114       | 356              | 75.9 (72.9-78.6)   |
| 16 to 17                                  | 63,974       | 402              | 70.5 (67.0-73.7)   |
| 18 to 19                                  | 58,608       | 508              | 63.7 (59.6-67.4)   |
| 20 to 21                                  | 45,716       | 598              | 53.6 (48.4-58.3)   |
| <b>18-64 years old</b>                    |              |                  |                    |
| Unvaccinated                              | 318,254      | 1,886            | 0.0 (0.0-0.0)      |
| 0 to 1 post-first dose                    | 6,752        | 39               | -14.8 (-60.3-17.8) |
| Partially vaccinated†                     | 90,633       | 328              | 57.0 (51.2-62.1)   |
| 0 to 1                                    | 46,147       | 73               | 80.8 (75.5-84.9)   |
| 2 to 3                                    | 49,899       | 69               | 87.0 (83.4-89.9)   |
| 4 to 5                                    | 51,801       | 78               | 89.5 (86.8-91.7)   |
| 6 to 7                                    | 52,099       | 84               | 90.5 (88.0-92.4)   |
| 8 to 9                                    | 51,963       | 130              | 84.6 (81.4-87.2)   |
| 10 to 11                                  | 51,475       | 136              | 83.3 (80.0-86.1)   |
| 12 to 13                                  | 50,082       | 152              | 83.2 (80.0-85.9)   |
| 14 to 15                                  | 46,488       | 199              | 79.4 (75.9-82.4)   |
| 16 to 17                                  | 42,421       | 214              | 74.6 (70.4-78.3)   |
| 18 to 19                                  | 37,181       | 211              | 65.9 (60.0-70.9)   |
| 20 to 21                                  | 24,478       | 185              | 51.1 (41.9-58.9)   |
| <b>65-79 years old</b>                    |              |                  |                    |
| Unvaccinated                              | 13,933       | 266              | 0.0 (0.0-0.0)      |
| 0 to 1 post-first dose                    | 97           | -                | -                  |
| Partially vaccinated†                     | 2,880        | 54               | 34.9 (12.5-51.6)   |
| 0 to 1                                    | 1,000        | 3                | 72.8 (13.9-91.4)   |
| 2 to 3                                    | 4,994        | 14               | 58.8 (24.7-77.5)   |
| 4 to 5                                    | 11,418       | 16               | 81.8 (68.0-89.6)   |
| 6 to 7                                    | 13,637       | 32               | 78.1 (66.7-85.6)   |
| 8 to 9                                    | 14,160       | 76               | 64.9 (52.4-74.1)   |
| 10 to 11                                  | 14,175       | 79               | 71.6 (62.0-78.8)   |
| 12 to 13                                  | 14,141       | 91               | 64.3 (53.0-72.8)   |

|                        |        |     |                     |
|------------------------|--------|-----|---------------------|
| 14 to 15               | 14,102 | 83  | 64.1 (52.8-72.7)    |
| 16 to 17               | 14,055 | 107 | 67.5 (58.4-74.6)    |
| 18 to 19               | 13,966 | 195 | 64.9 (56.8-71.4)    |
| 20 to 21               | 13,816 | 213 | 65.5 (57.9-71.8)    |
| <b>80+ year olds</b>   |        |     |                     |
| Unvaccinated           | 4,754  | 93  | 0.0 (0.0-0.0)       |
| 0 to 1 post-first dose | 11     | -   | -                   |
| Partially vaccinated†  | 1,248  | 38  | -26.5 (-85.1-13.5)  |
| 0 to 1                 | 105    | 2   | -55.3 (-537.4-62.1) |
| 2 to 3                 | 424    | 2   | 33.3 (-179.7-84.1)  |
| 4 to 5                 | 2,479  | 12  | -7.6 (-123.8-48.3)  |
| 6 to 7                 | 5,384  | 18  | 33.5 (-22.5-64.0)   |
| 8 to 9                 | 7,417  | 39  | 30.2 (-11.2-56.2)   |
| 10 to 11               | 7,562  | 65  | 35.0 (4.1-55.9)     |
| 12 to 13               | 7,550  | 94  | 30.9 (1.9-51.3)     |
| 14 to 15               | 7,524  | 74  | 47.2 (24.7-62.9)    |
| 16 to 17               | 7,498  | 81  | 32.1 (5.3-51.3)     |
| 18 to 19               | 7,461  | 102 | 36.9 (14.5-53.4)    |
| 20 to 21               | 7,421  | 200 | 20.6 (-3.8-39.2)    |

\* Adjusted for age, sex, deprivation, comorbidities, number of previous tests, interval between doses and temporal trend

† Partially vaccinated: ≥2 weeks post-first dose and before second dose

**Table S20: Rate ratios over time since receiving two ChAdOx1 doses for severe COVID-19 in Scotland using Pillar 2 testing (sensitivity analysis)**

| Follow-up period (weeks post second dose) | Person-years | Number of events | RR* (95% CI)      |
|-------------------------------------------|--------------|------------------|-------------------|
| 0 to 1                                    | 26,711       | ‡                | 0.90 (0.20 4.06)  |
| 2 to 3                                    | 31,851       | ‡                | Ref               |
| 4 to 5                                    | 38,717       | ‡                | 0.47 (0.09 2.57)  |
| 6 to 7                                    | 41,110       | 5                | 1.06 (0.28 4.01)  |
| 8 to 9                                    | 40,429       | 13               | 2.09 (0.66 6.61)  |
| 10 to 11                                  | 37,172       | 16               | 2.25 (0.72 7.02)  |
| 12 to 13                                  | 34,950       | 12               | 2.07 (0.64 6.70)  |
| 14 to 15                                  | 32,778       | 16               | 3.33 (1.07 10.36) |
| 16 to 17                                  | 30,150       | 12               | 2.38 (0.74 7.71)  |
| 18 to 19                                  | 29,004       | 24               | 4.13 (1.36 12.57) |
| 20 to 21                                  | 28,695       | 45               | 8.19 (2.76 24.30) |

\* Adjusted for age, sex, deprivation, comorbidities, number of previous tests, interval between doses and temporal trend

‡ Values suppressed due to small numbers.

**Table S21: Vaccine effectiveness estimates in Scotland for severe COVID-19 using Pillar 2 testing for outcome ascertainment in Scotland (sensitivity analysis)**

| Follow-up period (weeks post second dose) | Person-years | Number of events | RR* (95% CI)      |
|-------------------------------------------|--------------|------------------|-------------------|
| Unvaccinated                              | 336,942      | 887              | Ref               |
| 0 to 1 post-first dose                    | 6,860        | 11               | 28.1 (-32.4-60.9) |
| Partially vaccinated†                     | 94,761       | 165              | 51.7 (42.1-59.6)  |
| 0 to 1                                    | 47,252       | 17               | 89.1 (82.3-93.3)  |
| 2 to 3                                    | 55,318       | 22               | 89.9 (84.4-93.4)  |
| 4 to 5                                    | 65,698       | 32               | 89.9 (85.5-92.9)  |
| 6 to 7                                    | 71,120       | 42               | 89.3 (85.3-92.2)  |
| 8 to 9                                    | 73,540       | 58               | 85.8 (81.3-89.2)  |
| 10 to 11                                  | 73,212       | 71               | 83.5 (78.8-87.1)  |
| 12 to 13                                  | 71,773       | 108              | 76.9 (71.5-81.3)  |
| 14 to 15                                  | 68,114       | 126              | 73.4 (67.5-78.2)  |
| 16 to 17                                  | 63,974       | 120              | 71.7 (65.2-77.0)  |
| 18 to 19                                  | 58,608       | 156              | 58.4 (49.5-65.7)  |
| 20 to 21                                  | 45,716       | 164              | 43.2 (30.8-53.4)  |

\* Adjusted for age, sex, deprivation, comorbidities, number of previous tests, interval between doses and temporal trend

† Partially vaccinated: ≥2 weeks post-first dose and before second dose

‡ Values suppressed due to small numbers.

**Table S22: Rate ratios over time since receiving two ChAdOx1 doses for severe COVID-19 in Scotland among 40-64 year olds (sensitivity analysis)**

| Follow-up period (weeks post second dose) | Person-years | Number of events | RR (95% CI)        |
|-------------------------------------------|--------------|------------------|--------------------|
| 0 to 1                                    | 38,269       | 60               | 1.13 (0.78-1.64)   |
| 2 to 3                                    | 41,567       | 58               | Ref                |
| 4 to 5                                    | 43,199       | 64               | 0.96 (0.67-1.37)   |
| 6 to 7                                    | 43,441       | 69               | 1.03 (0.71-1.49)   |
| 8 to 9                                    | 43,280       | 114              | 2.03 (1.43-2.89)   |
| 10 to 11                                  | 42,646       | 115              | 2.46 (1.70-3.55)   |
| 12 to 13                                  | 40,250       | 123              | 2.79 (1.90-4.10)   |
| 14 to 15                                  | 36,513       | 163              | 3.96 (2.68-5.86)   |
| 16 to 17                                  | 33,385       | 183              | 5.65 (3.77-8.45)   |
| 18 to 19                                  | 25,070       | 170              | 7.99 (5.26-12.14)  |
| 20 to 21                                  | 13,391       | 137              | 11.93 (7.69-18.51) |

**Table S23: Vaccine effectiveness against severe COVID-19 estimated using an alternative reference period (0-13 days post-first ChAdOx1 dose) in Scotland**

| Follow-up period (weeks post second dose) | Person-years | Number of events | VE fully adjusted | VE minimally adjusted |
|-------------------------------------------|--------------|------------------|-------------------|-----------------------|
| Unvaccinated                              |              |                  |                   |                       |
| 0 to 1 post-first dose (Ref)              | 6,412        | 38               | Ref               | Ref                   |
| Partially vaccinated†                     | 134,874      | 488              | 63.7 (49.1-74.1)  | 58.8 (42.2, 70.7)     |
| 0 to 1                                    | 52,485       | 87               | 83.3 (75.3-88.7)  | 81.9 (73.2, 87.8)     |
| 2 to 3                                    | 63,055       | 90               | 88.5 (83.1-92.2)  | 87.1 (80.9, 91.3)     |
| 4 to 5                                    | 69,170       | 137              | 86.3 (80.1-90.5)  | 83.8 (76.4, 88.8)     |
| 6 to 7                                    | 72,186       | 239              | 78.7 (69.5-85.1)  | 73.9 (62.5, 81.8)     |
| 8 to 9                                    | 72,098       | 273              | 79.1 (70.0-85.4)  | 74.2 (62.8, 82.1)     |
| 10 to 11                                  | 70,990       | 338              | 76.2 (65.9-83.4)  | 70.6 (57.6, 79.6)     |
| 12 to 13                                  | 67,708       | 349              | 74.8 (63.7-82.5)  | 67.7 (53.4, 77.7)     |
| 14 to 15                                  | 63,639       | 398              | 68.6 (54.7-78.2)  | 57.7 (38.7, 70.8)     |
| 16 to 17                                  | 59,225       | 496              | 62.0 (45.1-73.7)  | 47.0 (22.8, 63.5)     |
| 18 to 19                                  | 47,382       | 597              | 51.8 (30.1-66.8)  | 30.7 (-1.2, 52.5)     |
| 20 to 21                                  | 33,880       | 549              | 43.7 (17.9-61.4)  | 17.6 (-21.1, 44.0)    |

Minimally adjusted includes age, sex, deprivation plus time periods whereas fully adjusted also included QCovid risk groups, number of previous tests and urban-rural classification.

† Partially vaccinated: ≥2 weeks post-first dose and before second dose

**Table S24: Vaccine effectiveness estimates for ChAdOx1 against COVID-19 hospitalisations or death by length of time since full vaccination in Brazil (reference group: 0-13 days post-first dose vaccination), stratified by age**

| Follow-up period (weeks post second dose) | Person-years | Number of events | VE* (95% CI)      |
|-------------------------------------------|--------------|------------------|-------------------|
| <b>Overall</b>                            |              |                  |                   |
| 0 to 2 post-first dose                    | 1,849,099    | 21736            | Ref               |
| Partially vaccinated                      | 11,701,310   | 37802            | 57.9 (56.9-58.9)  |
| 0 to 1                                    | 1,601,585    | 2688             | 73.2 (71.9-74.5)  |
| 2 to 3                                    | 1,492,259    | 1095             | 86.4 (85.4-87.3)  |
| 4 to 5                                    | 1,338,063    | 1019             | 83.5 (82.3-84.7)  |
| 6 to 7                                    | 1,117,983    | 1019             | 77.9 (76.1-79.5)  |
| 8 to 9                                    | 862,976      | 863              | 75.6 (73.4-77.6)  |
| 10 to 11                                  | 651,213      | 751              | 69.3 (66.3-72.1)  |
| 12 to 13                                  | 445,924      | 646              | 60.8 (56.6-64.6)  |
| 14 to 15                                  | 264,128      | 472              | 59.7 (54.6-64.2)  |
| 16 to 17                                  | 169,692      | 397              | 50.5 (43.4-56.6)  |
| 18 to 19                                  | 132,459      | 275              | 42.2 (32.4-50.6)  |
| <b>18-64 years</b>                        |              |                  |                   |
| 0 to 2 post-first dose                    | 1,733,794    | 19575            | Ref               |
| Partially vaccinated                      | 10,498,560   | 25556            | 59.9 (58.8-60.9)  |
| 0 to 1                                    | 1,412,977    | 1343             | 76.4 (74.8-77.9)  |
| 2 to 3                                    | 1,304,208    | 460              | 89.9 (88.8-90.8)  |
| 4 to 5                                    | 1,150,939    | 449              | 86.6 (85.1-87.9)  |
| 6 to 7                                    | 932,197      | 427              | 81 (78.7-83)      |
| 8 to 9                                    | 679,491      | 278              | 80.1 (77.1-82.7)  |
| 10 to 11                                  | 471,565      | 156              | 79.3 (75.2-82.8)  |
| 12 to 13                                  | 276,017      | 85               | 73.5 (66.5-79)    |
| 14 to 15                                  | 132,338      | 38               | 73.7 (63.6-81.1)  |
| 16 to 17                                  | 71,730       | 27               | 68.7 (54.1-78.7)  |
| 18 to 19                                  | 53,177       | 26               | 59 (39.5-72.3)    |
| <b>65-79 years</b>                        |              |                  |                   |
| 0 to 2 post-first dose                    | 110,032      | 2045             | Ref               |
| Partially vaccinated                      | 835,662      | 6711             | 41.7 (37.2-45.9)  |
| 0 to 1                                    | 129,587      | 514              | 63.4 (58.6-67.7)  |
| 2 to 3                                    | 129,105      | 252              | 78.2 (74.5-81.4)  |
| 4 to 5                                    | 128,303      | 219              | 77.4 (73.2-81)    |
| 6 to 7                                    | 127,116      | 229              | 72.1 (66.8-76.6)  |
| 8 to 9                                    | 125,081      | 222              | 68.5 (62.2-73.8)  |
| 10 to 11                                  | 121,588      | 219              | 54.3 (44.8-62.2)  |
| 12 to 13                                  | 112,337      | 189              | 40.7 (27.2-51.7)  |
| 14 to 15                                  | 74,978       | 105              | 48.9 (34.1-60.3)  |
| 16 to 17                                  | 42,052       | 82               | 25.5 (0.8-44.1)   |
| 18 to 19                                  | 25,487       | 49               | 13.3 (-23.4-39.1) |
| <b>80+ years</b>                          |              |                  |                   |

|                        |         |       |                    |
|------------------------|---------|-------|--------------------|
| 0 to 2 post-first dose | 5,273   | 116   | Ref                |
| Partially vaccinated   | 367,083 | 5,535 | 25.7 (10.5-38.4)   |
| 0 to 1                 | 59,022  | 831   | 45.5(33.6-55.3)    |
| 2 to 3                 | 58,946  | 383   | 66.1(57.9-72.7)    |
| 4 to 5                 | 58,821  | 351   | 59.0(48.7-67.3)    |
| 6 to 7                 | 58,670  | 363   | 45.7(31.8-56.8)    |
| 8 to 9                 | 58,404  | 363   | 40.5(24.9-52.9)    |
| 10 to 11               | 58,061  | 376   | 28.4(9.3-43.5)     |
| 12 to 13               | 57,570  | 372   | 15.1(-8.0-33.2)    |
| 14 to 15               | 56,812  | 329   | 8.8(-17.2-29.0)    |
| 16 to 17               | 55,910  | 288   | -3.4(-34.6-20.6)   |
| 18 to 19               | 53,794  | 200   | -19.1 (-59.2-10.9) |

\* Adjusted for age, sex, deprivation, macro-region of residence, primary reason for vaccination, interval between doses, and temporal trend

† Partially vaccinated: ≥2 weeks post-first dose and before second dose

**Table S25: Rate ratios over time since receiving two ChAdOx1 doses for severe COVID-19 in Scotland using an incidence-density matched case-control design (sensitivity analysis)**

| Follow-up period (weeks post second dose) | RR (95% CI)        |
|-------------------------------------------|--------------------|
| 0 to 1                                    | 1.28 (0.94, 1.75)  |
| 2 to 3                                    | 1.00 (Ref)         |
| 4 to 5                                    | 0.82 (0.6, 1.12)   |
| 6 to 7                                    | 1.04 (0.76, 1.43)  |
| 8 to 9                                    | 1.64 (1.2, 2.26)   |
| 10 to 11                                  | 1.83 (1.32, 2.55)  |
| 12 to 13                                  | 2.39 (1.71, 3.36)  |
| 14 to 15                                  | 2.60 (1.84, 3.69)  |
| 16 to 17                                  | 4.07 (2.84, 5.83)  |
| 18 to 19                                  | 5.18 (3.58, 7.5)   |
| 20 to 21                                  | 7.60 (5.19, 11.13) |

10 controls per case sampled, with exact matching for outcome date, sex, age (individual years up to 80, two-year bands 80-90, and five-year bands above that) and local authority. Statistical adjustment as per cohort models.

**Table S26: Formulae for models**

| Model                | Scotland                                                                                                                                                                                                                                                                                                                                                                                     | Brazil                                                                                                                                                                                                                                                                                                                                                                                            |
|----------------------|----------------------------------------------------------------------------------------------------------------------------------------------------------------------------------------------------------------------------------------------------------------------------------------------------------------------------------------------------------------------------------------------|---------------------------------------------------------------------------------------------------------------------------------------------------------------------------------------------------------------------------------------------------------------------------------------------------------------------------------------------------------------------------------------------------|
| Rate Ratios          | <p>Event <math>\sim</math> Poisson(PY*rate),<br/>                     PY is the person time exposure in the period</p> <p><math>\log(\text{rate}) = \text{Intercept} + \text{calendar\_period} + \text{post\_dose2\_period} + \text{vaccine\_gap} + \text{age\_group} + \text{gender} + \text{deprivation} + \text{clinical and testing characteristics (see table S26 – part 1)}</math></p> | $\beta_0 + \beta_1 * \text{age} + \beta_2 * \text{sex} + \beta_3 * \text{week} + \beta_4 * \text{state-of-residence} + \beta_5 * \text{reason-to-vaccination} + \beta_6 * \text{deprivation-municipal} + \beta_7 * \text{post-vaccination-period} + \beta_8 * \text{age} * \text{week} + \beta_9 * \text{week} * \text{state-of-residence} + \beta_{10} * \text{age} * \text{state-of-residence}$ |
| Vaccine Effects      | <p>Event <math>\sim</math> Poisson(PY*rate),<br/>                     PY is the person time exposure in the period</p> <p><math>\log(\text{rate}) = \text{Intercept} + \text{calendar\_period} + \text{vaccine status} + \text{age\_group} + \text{gender} + \text{deprivation} + \text{clinical and testing characteristics (see table S26 – part 2)}</math></p>                            |                                                                                                                                                                                                                                                                                                                                                                                                   |
| Test Negative Design | <p>Event <math>\sim</math> Binomial (N, p)<br/>                     N is the number of tests;</p> <p><math>\text{logit}(p) \sim \text{Intercept} + s(\text{age}) + s(\text{days}) + \text{deprivation} + \text{clinical risk groups} + \text{number of tests groups} + \text{geographical region}</math></p>                                                                                 |                                                                                                                                                                                                                                                                                                                                                                                                   |

**Table S27: Estimates of covariates from main adjusted models for the primary outcome (COVID-19 hospitalisation or death) in two-dose and vaccine effectiveness cohorts in Scotland**

**Estimates for covariates from model for estimating rate ratios in the overall two-dose cohort in Scotland**

| Variable            | Categories  | RR   | L95  | U95   |
|---------------------|-------------|------|------|-------|
|                     | (Intercept) | 0.00 | 0.00 | 0.00  |
| Period              | 19/05/2021  | 0.60 | 0.40 | 0.90  |
|                     | 26/05/2021  | 0.70 | 0.49 | 1.01  |
|                     | 02/06/2021  | 0.75 | 0.54 | 1.05  |
|                     | 09/06/2021  | 0.60 | 0.43 | 0.84  |
|                     | 16/06/2021  | 0.85 | 0.63 | 1.13  |
|                     | 23/06/2021  | 1.00 |      |       |
|                     | 30/06/2021  | 1.52 | 1.19 | 1.94  |
|                     | 07/07/2021  | 1.65 | 1.30 | 2.09  |
|                     | 14/07/2021  | 0.95 | 0.74 | 1.23  |
|                     | 21/07/2021  | 0.91 | 0.70 | 1.18  |
|                     | 28/07/2021  | 0.47 | 0.35 | 0.63  |
|                     | 04/08/2021  | 0.49 | 0.37 | 0.66  |
|                     | 11/08/2021  | 0.39 | 0.29 | 0.52  |
|                     | 18/08/2021  | 0.64 | 0.49 | 0.84  |
|                     | 25/08/2021  | 1.03 | 0.80 | 1.33  |
|                     | 01/09/2021  | 1.21 | 0.94 | 1.57  |
|                     | 08/09/2021  | 1.15 | 0.89 | 1.49  |
|                     | 15/09/2021  | 0.80 | 0.61 | 1.06  |
|                     | 22/09/2021  | 0.61 | 0.46 | 0.81  |
|                     | 29/09/2021  | 0.52 | 0.39 | 0.69  |
|                     | 06/10/2021  | 0.45 | 0.33 | 0.60  |
| 13/10/2021          | 0.42        | 0.30 | 0.57 |       |
| Post Vaccine Period | 0 to 1      | 1.24 | 0.91 | 1.69  |
|                     | 2 to 3      | 1.00 |      |       |
|                     | 4 to 5      | 0.87 | 0.65 | 1.16  |
|                     | 6 to 7      | 1.02 | 0.77 | 1.35  |
|                     | 8 to 9      | 1.81 | 1.40 | 2.35  |
|                     | 10 to 11    | 2.01 | 1.54 | 2.62  |
|                     | 12 to 13    | 2.52 | 1.92 | 3.32  |
|                     | 14 to 15    | 3.01 | 2.26 | 3.99  |
|                     | 16 to 17    | 4.01 | 2.99 | 5.38  |
| Vaccine Gap         | 18 to 19    | 5.43 | 4.00 | 7.38  |
|                     | 20 to 21    | 7.39 | 5.37 | 10.18 |
|                     | <7 weeks    | 1.01 | 0.81 | 1.26  |
|                     | 7-8 weeks   | 0.90 | 0.81 | 1.00  |
|                     | 9-10 weeks  | 0.92 | 0.86 | 1.00  |
|                     | 11-12 weeks | 1.00 |      |       |



|                    |                          |      |      |      |
|--------------------|--------------------------|------|------|------|
|                    | 13+ weeks                | 1.47 | 1.23 | 1.76 |
| Age Group          | 16-19                    | 0.79 | 0.40 | 1.53 |
|                    | 20-24                    | 0.57 | 0.37 | 0.87 |
|                    | 25-29                    | 0.90 | 0.67 | 1.22 |
|                    | 30-34                    | 0.89 | 0.68 | 1.16 |
|                    | 35-39                    | 1.12 | 0.90 | 1.40 |
|                    | 40-44                    | 1.02 | 0.84 | 1.25 |
|                    | 45-49                    | 1.06 | 0.89 | 1.27 |
|                    | 50-54                    | 0.91 | 0.78 | 1.06 |
|                    | 55-59                    | 0.99 | 0.86 | 1.14 |
|                    | 60-69                    | 1.00 |      |      |
|                    | 65-69                    | 1.03 | 0.88 | 1.20 |
|                    | 70-74                    | 1.23 | 1.07 | 1.42 |
|                    | 75-79                    | 1.22 | 1.06 | 1.41 |
|                    | 80-84                    | 1.36 | 1.17 | 1.58 |
|                    | 85-89                    | 1.53 | 1.30 | 1.80 |
|                    | 90+                      | 1.78 | 1.48 | 2.16 |
| Gender             | Female                   | 1.00 |      |      |
|                    | Male                     | 1.32 | 1.24 | 1.41 |
| Deprivation        | Q1                       | 1.00 |      |      |
| Scottish Index of  | Q2                       | 0.83 | 0.76 | 0.90 |
| Multiple           | Q3                       | 0.62 | 0.56 | 0.68 |
| Deprivation        | Q4                       | 0.56 | 0.51 | 0.62 |
| Quintiles          | Q5                       | 0.45 | 0.41 | 0.50 |
| Urban Rural        | 1 Large Urban Areas      | 1.00 |      |      |
| Classification     | 2 Other Urban Areas      | 0.91 | 0.85 | 0.97 |
|                    | 3 Accessible Small Towns | 0.72 | 0.64 | 0.81 |
|                    | 4 Remote Small Towns     | 0.45 | 0.38 | 0.54 |
|                    | 5 Accessible Rural       | 0.67 | 0.59 | 0.76 |
|                    | 6 Remote Rural           | 0.35 | 0.28 | 0.43 |
| Number of previous | 0                        | 1.00 |      |      |
| Covid Tests        | 1                        | 1.53 | 1.41 | 1.66 |
|                    | 2                        | 1.91 | 1.71 | 2.14 |
|                    | 3-4                      | 2.68 | 2.40 | 3.00 |
|                    | 5-9                      | 3.04 | 2.66 | 3.48 |
|                    | 10+                      | 3.11 | 2.62 | 3.69 |
| Body Mass Index    | <20                      | 1.00 |      |      |
|                    | 20-24                    | 0.98 | 0.79 | 1.21 |
|                    | 25-29                    | 1.08 | 0.88 | 1.32 |
|                    | 30-34                    | 1.24 | 1.01 | 1.53 |
|                    | 34-39                    | 1.68 | 1.35 | 2.10 |
|                    | 40+                      | 2.23 | 1.77 | 2.81 |
| Health conditions  | AF                       | 1.07 | 0.96 | 1.19 |
|                    | ASTHMA                   | 1.20 | 1.11 | 1.30 |

|                                        |                       |      |      |      |
|----------------------------------------|-----------------------|------|------|------|
|                                        | CCF                   | 1.20 | 1.06 | 1.36 |
|                                        | CHD                   | 1.26 | 1.17 | 1.37 |
|                                        | COPD                  | 1.55 | 1.41 | 1.70 |
|                                        | DIABETES              | 1.75 | 1.62 | 1.88 |
|                                        | EPILEPSY              | 1.34 | 1.13 | 1.60 |
|                                        | FRACTURE              | 1.18 | 1.06 | 1.31 |
|                                        | PVD                   | 1.00 | 0.86 | 1.17 |
|                                        | RA/SLE                | 1.54 | 1.30 | 1.81 |
|                                        | Severe Mental Illness | 1.20 | 1.11 | 1.30 |
|                                        | STROKE                | 1.28 | 1.16 | 1.41 |
|                                        | VTE                   | 1.36 | 1.20 | 1.53 |
|                                        | CKD                   | 1.38 | 1.27 | 1.50 |
| GP Smoking Status                      | Non-Smoker            | 1.00 |      |      |
|                                        | Ex-Smoker             | 1.04 | 0.96 | 1.13 |
|                                        | Smoker                | 1.01 | 0.93 | 1.09 |
|                                        | Unknown               | 0.98 | 0.81 | 1.19 |
| Blood Pressure                         | No Measurement        | 1.00 |      |      |
|                                        | Low                   | 1.50 | 1.10 | 2.04 |
|                                        | Normal                | 1.22 | 1.01 | 1.47 |
|                                        | High                  | 1.28 | 1.05 | 1.57 |
|                                        | Very High             | 1.21 | 0.95 | 1.54 |
| Number of other Q<br>Covid risk groups | 0                     | 1.00 |      |      |
|                                        | 1                     | 1.49 | 1.37 | 1.61 |
|                                        | 2+                    | 1.30 | 1.04 | 1.62 |

**Estimates for covariates from model for estimating vaccine effectiveness in the overall population in Scotland**

| Variable       | Category           | RR   | L95  | U95  |
|----------------|--------------------|------|------|------|
|                | (Intercept)        | 0.00 | 0.00 | 0.00 |
| Period         | 18/05/2021         | 0.38 | 0.30 | 0.48 |
|                | 25/05/2021         | 0.50 | 0.40 | 0.63 |
|                | 01/06/2021         | 0.43 | 0.34 | 0.55 |
|                | 08/06/2021         | 0.68 | 0.55 | 0.84 |
|                | 15/06/2021         | 0.69 | 0.56 | 0.86 |
|                | 22/06/2021         | 1.00 |      |      |
|                | 29/06/2021         | 1.61 | 1.36 | 1.92 |
|                | 06/07/2021         | 2.08 | 1.76 | 2.46 |
|                | 13/07/2021         | 1.59 | 1.33 | 1.90 |
|                | 20/07/2021         | 1.25 | 1.03 | 1.50 |
|                | 27/07/2021         | 0.91 | 0.75 | 1.11 |
|                | 03/08/2021         | 0.87 | 0.71 | 1.06 |
|                | 10/08/2021         | 0.68 | 0.55 | 0.84 |
|                | 17/08/2021         | 1.02 | 0.85 | 1.24 |
|                | 24/08/2021         | 1.83 | 1.54 | 2.17 |
|                | 31/08/2021         | 2.53 | 2.15 | 2.98 |
|                | 07/09/2021         | 2.60 | 2.21 | 3.07 |
|                | 14/09/2021         | 2.11 | 1.79 | 2.49 |
|                | 21/09/2021         | 1.52 | 1.28 | 1.81 |
|                | 28/09/2021         | 1.36 | 1.14 | 1.62 |
|                | 05/10/2021         | 1.21 | 1.01 | 1.46 |
|                | 12/10/2021         | 1.20 | 1.00 | 1.44 |
|                | 19/10/2021         | 0.79 | 0.65 | 0.96 |
| Vaccine Status | Unvaccinated       | 1.00 |      |      |
|                | 0 to 1 post dose 1 | 1.15 | 0.83 | 1.61 |
|                | 2+ dose 1          | 0.51 | 0.45 | 0.57 |
|                | 0 to 1             | 0.22 | 0.18 | 0.28 |
|                | 2 to 3             | 0.16 | 0.13 | 0.20 |
|                | 4 to 5             | 0.13 | 0.11 | 0.16 |
|                | 6 to 7             | 0.13 | 0.11 | 0.16 |
|                | 8 to 9             | 0.21 | 0.18 | 0.24 |
|                | 10 to 11           | 0.20 | 0.18 | 0.23 |
|                | 12 to 13           | 0.23 | 0.20 | 0.25 |
|                | 14 to 15           | 0.24 | 0.21 | 0.27 |
|                | 16 to 17           | 0.29 | 0.26 | 0.33 |
|                | 18 to 19           | 0.36 | 0.33 | 0.40 |
|                | 20 to 21           | 0.46 | 0.42 | 0.52 |
| Age Group      | 16-19              | 0.58 | 0.43 | 0.79 |
|                | 20-24              | 0.42 | 0.35 | 0.50 |
|                | 25-29              | 0.55 | 0.47 | 0.64 |

|                    |                          |      |      |      |
|--------------------|--------------------------|------|------|------|
|                    | 30-34                    | 0.68 | 0.59 | 0.79 |
|                    | 35-39                    | 0.84 | 0.74 | 0.96 |
|                    | 40-44                    | 0.78 | 0.69 | 0.88 |
|                    | 45-49                    | 0.84 | 0.74 | 0.95 |
|                    | 50-54                    | 0.87 | 0.77 | 0.98 |
|                    | 55-59                    | 0.91 | 0.81 | 1.01 |
|                    | 60-69                    | 1.00 |      |      |
|                    | 65-69                    | 1.12 | 0.99 | 1.26 |
|                    | 70-74                    | 1.24 | 1.10 | 1.39 |
|                    | 75-79                    | 1.34 | 1.20 | 1.51 |
|                    | 80-84                    | 1.47 | 1.30 | 1.65 |
|                    | 85-89                    | 1.73 | 1.52 | 1.97 |
|                    | 90+                      | 1.88 | 1.61 | 2.20 |
| Gender             | Female                   | 1.00 |      |      |
|                    | Male                     | 1.18 | 1.13 | 1.24 |
| Deprivation        | Q1                       | 1.00 |      |      |
| Scottish Index of  | Q2                       | 0.84 | 0.79 | 0.90 |
| Multiple           | Q3                       | 0.69 | 0.64 | 0.74 |
| Deprivation        | Q4                       | 0.62 | 0.58 | 0.67 |
| Quintiles          | Q5                       | 0.52 | 0.48 | 0.56 |
| Urban Rural        | 1 Large Urban Areas      | 1.00 |      |      |
| Classification     | 2 Other Urban Areas      | 0.95 | 0.90 | 1.00 |
|                    | 3 Accessible Small Towns | 0.75 | 0.68 | 0.82 |
|                    | 4 Remote Small Towns     | 0.51 | 0.44 | 0.58 |
|                    | 5 Accessible Rural       | 0.72 | 0.65 | 0.79 |
|                    | 6 Remote Rural           | 0.42 | 0.36 | 0.50 |
| Number of previous | 0                        | 1.00 |      |      |
| Covid Tests        | 1                        | 1.62 | 1.52 | 1.72 |
|                    | 2                        | 1.90 | 1.71 | 2.11 |
|                    | 3-4                      | 2.48 | 2.20 | 2.80 |
|                    | 5-9                      | 2.25 | 1.89 | 2.67 |
|                    | 10+                      | 2.02 | 1.66 | 2.46 |
| Body Mass Index    | <20                      | 1.00 |      |      |
|                    | 20-24                    | 1.07 | 0.91 | 1.27 |
|                    | 25-29                    | 1.18 | 1.00 | 1.38 |
|                    | 30-34                    | 1.50 | 1.28 | 1.77 |
|                    | 34-39                    | 2.01 | 1.69 | 2.39 |
|                    | 40+                      | 2.43 | 2.02 | 2.91 |
|                    | AF                       | 1.11 | 1.01 | 1.22 |
| Health condition   | ASTHMA                   | 1.24 | 1.17 | 1.32 |
|                    | CCF                      | 1.19 | 1.06 | 1.34 |
|                    | CHD                      | 1.23 | 1.14 | 1.32 |
|                    | COPD                     | 1.66 | 1.53 | 1.80 |
|                    | DIABETES                 | 1.65 | 1.55 | 1.76 |

|                     |                       |      |      |      |
|---------------------|-----------------------|------|------|------|
|                     | EPILEPSY              | 1.31 | 1.13 | 1.51 |
|                     | FRACTURE              | 1.20 | 1.10 | 1.31 |
|                     | PVD                   | 1.12 | 0.98 | 1.28 |
|                     | RA/SLE                | 1.46 | 1.26 | 1.69 |
|                     | Severe Mental Illness | 1.15 | 1.08 | 1.23 |
|                     | STROKE                | 1.26 | 1.15 | 1.37 |
|                     | VTE                   | 1.25 | 1.13 | 1.39 |
|                     | CKD                   | 1.32 | 1.23 | 1.43 |
| GP Smoking Status   | Non-Smoker            | 1.00 |      |      |
|                     | Ex-Smoker             | 0.99 | 0.93 | 1.06 |
|                     | Smoker                | 0.87 | 0.82 | 0.92 |
|                     | Unknown               | 1.08 | 0.98 | 1.20 |
| Blood Pressure      | No Measurement        | 1.00 |      |      |
|                     | Low                   | 1.46 | 1.18 | 1.81 |
|                     | Normal                | 1.62 | 1.47 | 1.79 |
|                     | High                  | 1.69 | 1.50 | 1.89 |
|                     | Very High             | 1.68 | 1.44 | 1.97 |
| Number of other     | 0                     | 1.00 |      |      |
| Q Covid Risk Groups | 1                     | 1.54 | 1.43 | 1.65 |
|                     | 2+                    | 1.44 | 1.18 | 1.74 |

See Table S5 for definition of QCovid groups

**Table S28: ICD-10 codes for COVID-19 illness**

| Code                                                                                                                                                      | Description                    |
|-----------------------------------------------------------------------------------------------------------------------------------------------------------|--------------------------------|
| U07.1                                                                                                                                                     | Covid-19, virus identified     |
| U07.2                                                                                                                                                     | Covid-19, virus not identified |
| Source: <a href="https://www.who.int/classifications/icd/COVID-19-coding-icd10.pdf">https://www.who.int/classifications/icd/COVID-19-coding-icd10.pdf</a> |                                |

**Table S29: Reporting STROBE and RECORD checklists**

|                           | Item No. | STROBE items                                                                                                                                                                               | RECORD items                                                                                                                                                                                                                                                                                                                                                                                                                                       | Location in manuscript where items are reported                       |
|---------------------------|----------|--------------------------------------------------------------------------------------------------------------------------------------------------------------------------------------------|----------------------------------------------------------------------------------------------------------------------------------------------------------------------------------------------------------------------------------------------------------------------------------------------------------------------------------------------------------------------------------------------------------------------------------------------------|-----------------------------------------------------------------------|
| <b>Title and abstract</b> |          |                                                                                                                                                                                            |                                                                                                                                                                                                                                                                                                                                                                                                                                                    |                                                                       |
|                           | 1        | (a) Indicate the study's design with a commonly used term in the title or the abstract (b) Provide in the abstract an informative and balanced summary of what was done and what was found | <p>RECORD 1.1: The type of data used should be specified in the title or abstract. When possible, the name of the databases used should be included.</p> <p>RECORD 1.2: If applicable, the geographic region and timeframe within which the study took place should be reported in the title or abstract.</p> <p>RECORD 1.3: If linkage between databases was conducted for the study, this should be clearly stated in the title or abstract.</p> | Abstract                                                              |
| Background rationale      | 2        | Explain the scientific background and rationale for the investigation being reported                                                                                                       |                                                                                                                                                                                                                                                                                                                                                                                                                                                    | Introduction, paras 1 and 2.                                          |
| Objectives                | 3        | State specific objectives, including any prespecified hypotheses                                                                                                                           |                                                                                                                                                                                                                                                                                                                                                                                                                                                    | Introduction, last paragraph                                          |
| Study Design              | 4        | Present key elements of study design early in the paper                                                                                                                                    |                                                                                                                                                                                                                                                                                                                                                                                                                                                    | Methods, first paragraph                                              |
| Setting                   | 5        | Describe the setting, locations, and relevant dates, including periods of recruitment, exposure, follow-up, and data collection                                                            |                                                                                                                                                                                                                                                                                                                                                                                                                                                    | Methods – study design and datasets and comparative analyses sections |
| Participants              | 6        | (a) <i>Cohort study</i> - Give the eligibility criteria, and the                                                                                                                           | RECORD 6.1: The methods of study population selection (such                                                                                                                                                                                                                                                                                                                                                                                        | Methods – study design                                                |

|                           |    |                                                                                                                                                                                                                                                                                                                                                                                                                                                                                                                                                                                                                                                             |                                                                                                                                                                                                                                                                                                                                                                                                                                                                                                                                                                                                                                          |                                                                        |
|---------------------------|----|-------------------------------------------------------------------------------------------------------------------------------------------------------------------------------------------------------------------------------------------------------------------------------------------------------------------------------------------------------------------------------------------------------------------------------------------------------------------------------------------------------------------------------------------------------------------------------------------------------------------------------------------------------------|------------------------------------------------------------------------------------------------------------------------------------------------------------------------------------------------------------------------------------------------------------------------------------------------------------------------------------------------------------------------------------------------------------------------------------------------------------------------------------------------------------------------------------------------------------------------------------------------------------------------------------------|------------------------------------------------------------------------|
|                           |    | <p>sources and methods of selection of participants. Describe methods of follow-up</p> <p><i>Case-control study</i> - Give the eligibility criteria, and the sources and methods of case ascertainment and control selection. Give the rationale for the choice of cases and controls</p> <p><i>Cross-sectional study</i> - Give the eligibility criteria, and the sources and methods of selection of participants</p> <p><i>(b) Cohort study</i> - For matched studies, give matching criteria and number of exposed and unexposed</p> <p><i>Case-control study</i> - For matched studies, give matching criteria and the number of controls per case</p> | <p>as codes or algorithms used to identify subjects) should be listed in detail. If this is not possible, an explanation should be provided.</p> <p>RECORD 6.2: Any validation studies of the codes or algorithms used to select the population should be referenced. If validation was conducted for this study and not published elsewhere, detailed methods and results should be provided.</p> <p>RECORD 6.3: If the study involved linkage of databases, consider use of a flow diagram or other graphical display to demonstrate the data linkage process, including the number of individuals with linked data at each stage.</p> | <p>and datasets and comparative analyses sections</p>                  |
| Variables                 | 7  | Clearly define all outcomes, exposures, predictors, potential confounders, and effect modifiers. Give diagnostic criteria, if applicable.                                                                                                                                                                                                                                                                                                                                                                                                                                                                                                                   | RECORD 7.1: A complete list of codes and algorithms used to classify exposures, outcomes, confounders, and effect modifiers should be provided. If these cannot be reported, an explanation should be provided.                                                                                                                                                                                                                                                                                                                                                                                                                          | Methods – Exposure, Outcome and Confounders sections.                  |
| Data sources/ measurement | 8  | For each variable of interest, give sources of data and details of methods of assessment (measurement). Describe comparability of assessment methods if there is more than one group                                                                                                                                                                                                                                                                                                                                                                                                                                                                        |                                                                                                                                                                                                                                                                                                                                                                                                                                                                                                                                                                                                                                          | Methods – study design and datasets. Appendix.                         |
| Bias                      | 9  | Describe any efforts to address potential sources of bias                                                                                                                                                                                                                                                                                                                                                                                                                                                                                                                                                                                                   |                                                                                                                                                                                                                                                                                                                                                                                                                                                                                                                                                                                                                                          | Methods – study design and datasets. Sensitivity analyses in Appendix. |
| Study size                | 10 | Explain how the study size was arrived at                                                                                                                                                                                                                                                                                                                                                                                                                                                                                                                                                                                                                   |                                                                                                                                                                                                                                                                                                                                                                                                                                                                                                                                                                                                                                          | STROBE flowcharts                                                      |



|                                  |    |                                                                                                                                                                                                                                                                                                                                                                                                                                                                                                                                                                                                     |                                                                                                                                                                                                                                                                     |                                                                 |
|----------------------------------|----|-----------------------------------------------------------------------------------------------------------------------------------------------------------------------------------------------------------------------------------------------------------------------------------------------------------------------------------------------------------------------------------------------------------------------------------------------------------------------------------------------------------------------------------------------------------------------------------------------------|---------------------------------------------------------------------------------------------------------------------------------------------------------------------------------------------------------------------------------------------------------------------|-----------------------------------------------------------------|
|                                  |    |                                                                                                                                                                                                                                                                                                                                                                                                                                                                                                                                                                                                     |                                                                                                                                                                                                                                                                     | (Figures S2 and S3)                                             |
| Quantitative variables           | 11 | Explain how quantitative variables were handled in the analyses. If applicable, describe which groupings were chosen, and why                                                                                                                                                                                                                                                                                                                                                                                                                                                                       |                                                                                                                                                                                                                                                                     | Methods – Exposure, Outcome and Confounders sections. Appendix. |
| Statistical methods              | 12 | <p>(a) Describe all statistical methods, including those used to control for confounding</p> <p>(b) Describe any methods used to examine subgroups and interactions</p> <p>(c) Explain how missing data were addressed</p> <p>(d) <i>Cohort study</i> - If applicable, explain how loss to follow-up was addressed</p> <p><i>Case-control study</i> - If applicable, explain how matching of cases and controls was addressed</p> <p><i>Cross-sectional study</i> - If applicable, describe analytical methods taking account of sampling strategy</p> <p>(e) Describe any sensitivity analyses</p> |                                                                                                                                                                                                                                                                     | Methods – statistical analysis section                          |
| Data access and cleaning methods |    | ..                                                                                                                                                                                                                                                                                                                                                                                                                                                                                                                                                                                                  | <p>RECORD 12.1: Authors should describe the extent to which the investigators had access to the database population used to create the study population.</p> <p>RECORD 12.2: Authors should provide information on the data cleaning methods used in the study.</p> | Methods Supplement (Figures S2 and S3)                          |
| Linkage                          |    | ..                                                                                                                                                                                                                                                                                                                                                                                                                                                                                                                                                                                                  | RECORD 12.3: State whether the study included person-level, institutional-level, or other data linkage across two or more                                                                                                                                           | Methods Supplement (Figures S2 and S3)                          |

|                  |    |                                                                                                                                                                                                                                                                                                                                                            |                                                                                                                                                                                                                                                                                                                    |                                     |
|------------------|----|------------------------------------------------------------------------------------------------------------------------------------------------------------------------------------------------------------------------------------------------------------------------------------------------------------------------------------------------------------|--------------------------------------------------------------------------------------------------------------------------------------------------------------------------------------------------------------------------------------------------------------------------------------------------------------------|-------------------------------------|
|                  |    |                                                                                                                                                                                                                                                                                                                                                            | databases. The methods of linkage and methods of linkage quality evaluation should be provided.                                                                                                                                                                                                                    |                                     |
|                  |    |                                                                                                                                                                                                                                                                                                                                                            |                                                                                                                                                                                                                                                                                                                    |                                     |
| Participants     | 13 | <p>(a) Report the numbers of individuals at each stage of the study (<i>e.g.</i>, numbers potentially eligible, examined for eligibility, confirmed eligible, included in the study, completing follow-up, and analysed)</p> <p>(b) Give reasons for non-participation at each stage.</p> <p>(c) Consider use of a flow diagram</p>                        | RECORD 13.1: Describe in detail the selection of the persons included in the study ( <i>i.e.</i> , study population selection) including filtering based on data quality, data availability and linkage. The selection of included persons can be described in the text and/or by means of the study flow diagram. | STROBE flowchart (Figure S6 and S9) |
| Descriptive data | 14 | <p>(a) Give characteristics of study participants (<i>e.g.</i>, demographic, clinical, social) and information on exposures and potential confounders</p> <p>(b) Indicate the number of participants with missing data for each variable of interest</p> <p>(c) <i>Cohort study</i> - summarise follow-up time (<i>e.g.</i>, average and total amount)</p> |                                                                                                                                                                                                                                                                                                                    | Table 1 and Supplement              |
| Outcome data     | 15 | <p><i>Cohort study</i> - Report numbers of outcome events or summary measures over time</p> <p><i>Case-control study</i> - Report numbers in each exposure category, or summary measures of exposure</p> <p><i>Cross-sectional study</i> - Report numbers of outcome events or summary measures</p>                                                        |                                                                                                                                                                                                                                                                                                                    | Table 1                             |
| Main results     | 16 | (a) Give unadjusted estimates and, if applicable, confounder- adjusted                                                                                                                                                                                                                                                                                     |                                                                                                                                                                                                                                                                                                                    | Appendix tables.                    |

|                  |    |                                                                                                                                                                                                                                                                                                                                                          |                                                                                                                                                                                                                                                                                                          |                                          |
|------------------|----|----------------------------------------------------------------------------------------------------------------------------------------------------------------------------------------------------------------------------------------------------------------------------------------------------------------------------------------------------------|----------------------------------------------------------------------------------------------------------------------------------------------------------------------------------------------------------------------------------------------------------------------------------------------------------|------------------------------------------|
|                  |    | <p>estimates and their precision (e.g., 95% confidence interval). Make clear which confounders were adjusted for and why they were included</p> <p>(b) Report category boundaries when continuous variables were categorized</p> <p>(c) If relevant, consider translating estimates of relative risk into absolute risk for a meaningful time period</p> |                                                                                                                                                                                                                                                                                                          |                                          |
| Other analyses   | 17 | Report other analyses done—e.g., analyses of subgroups and interactions, and sensitivity analyses                                                                                                                                                                                                                                                        |                                                                                                                                                                                                                                                                                                          | Appendix tables.                         |
|                  |    |                                                                                                                                                                                                                                                                                                                                                          |                                                                                                                                                                                                                                                                                                          |                                          |
| Key results      | 18 | Summarise key results with reference to study objectives                                                                                                                                                                                                                                                                                                 |                                                                                                                                                                                                                                                                                                          | Discussion, first paragraph              |
| Limitations      | 19 | Discuss limitations of the study, taking into account sources of potential bias or imprecision. Discuss both direction and magnitude of any potential bias                                                                                                                                                                                               | RECORD 19.1: Discuss the implications of using data that were not created or collected to answer the specific research question(s). Include discussion of misclassification bias, unmeasured confounding, missing data, and changing eligibility over time, as they pertain to the study being reported. | Discussion, fifth paragraph              |
| Interpretation   | 20 | Give a cautious overall interpretation of results considering objectives, limitations, multiplicity of analyses, results from similar studies, and other relevant evidence                                                                                                                                                                               |                                                                                                                                                                                                                                                                                                          | Discussion, sixth and seventh paragraphs |
| Generalisability | 21 | Discuss the generalisability (external validity) of the study results                                                                                                                                                                                                                                                                                    |                                                                                                                                                                                                                                                                                                          | Discussion, fourth paragraph             |
|                  |    |                                                                                                                                                                                                                                                                                                                                                          |                                                                                                                                                                                                                                                                                                          |                                          |
| Funding          | 22 | Give the source of funding and the role of the funders                                                                                                                                                                                                                                                                                                   |                                                                                                                                                                                                                                                                                                          | Acknowledgements                         |

|                                                           |  |                                                                                                        |                                                                                                                                                          |                         |
|-----------------------------------------------------------|--|--------------------------------------------------------------------------------------------------------|----------------------------------------------------------------------------------------------------------------------------------------------------------|-------------------------|
|                                                           |  | for the present study and, if applicable, for the original study on which the present article is based |                                                                                                                                                          |                         |
| Accessibility of protocol, raw data, and programming code |  | ..                                                                                                     | RECORD 22.1: Authors should provide information on how to access any supplemental information such as the study protocol, raw data, or programming code. | SAP and code via github |

Figure S1: Distribution of variants over time in Scotland

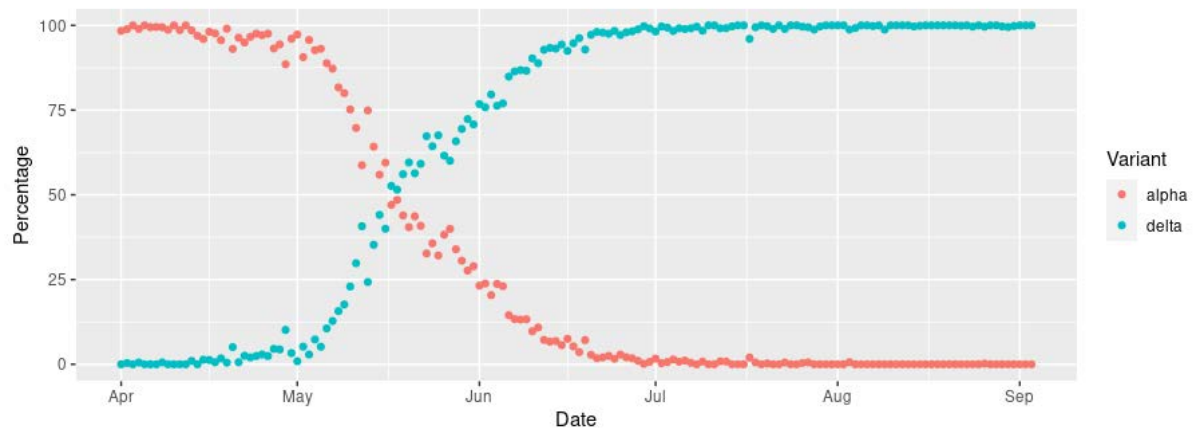

**Figure S2: Data linkage diagram for Scotland**

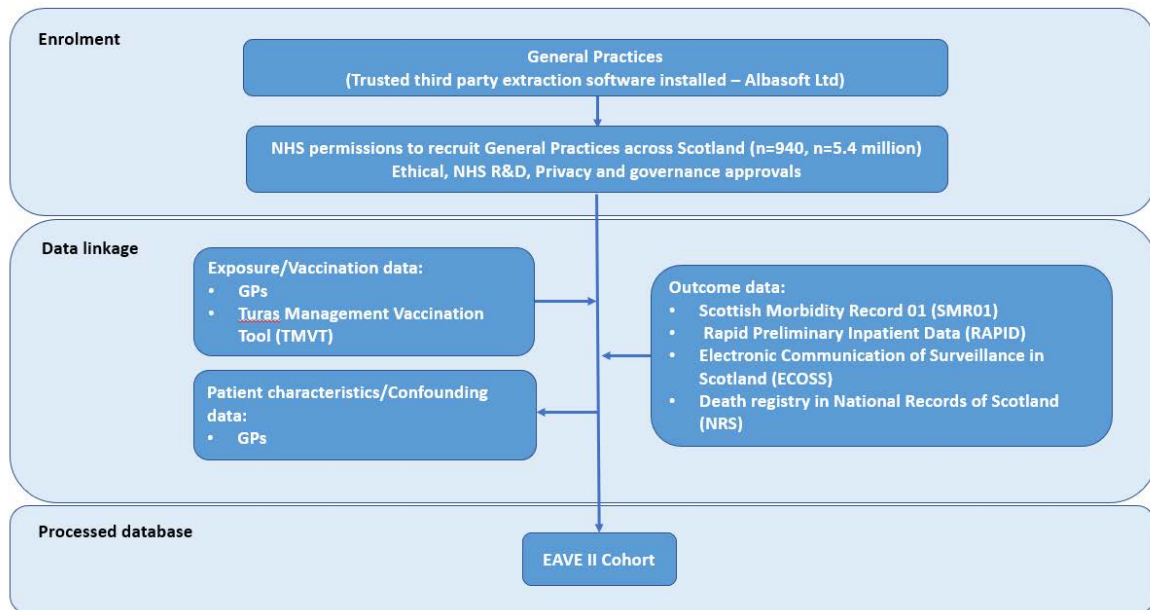

Figure adapted from Vasileiou et al.<sup>1</sup>

Note: Community Health Index (CHI) numbers were used to link all datasets. Details on these datasets are available in our published protocol.<sup>2</sup> There are two core methods of recording vaccine delivery, the national Turas Management Vaccination Tool (TMVT) system and local GP IT systems. TMVT was developed as a web application by NHS Education Scotland (NES). It is in general the preferred method of recording a vaccination where this is done outside the normal vaccine locations, predominantly dedicated vaccination centres and community programmes. Most vaccinations delivered in general practice settings are recorded in local IT systems; there are a few geographical areas that have however mandated the use of TMVT in every setting, including GP practices. Currently GPs are paid per 100 vaccines administered so they are highly motivated to record information accurately. If this is not recorded to a minimum standard, they will not receive payment. All vaccines administered through vaccination centres and community programmes are accounted for on a daily basis. All vaccines recorded via TMVT are transferred to the national clinical data store (NCDS) then to Albasoft on a daily basis. At 9pm each night, these are loaded into a secure database and each practice “polls” the data store as part of the ESCRO data pump run between 12:00am and 5:00am each day to request the records for their specific practice. These are then loaded into a local queue at the practice for processing later in the day. As part of the same data pump run, the local GP IT system is queried and all vaccination records for the previous day are extracted (with a 10 day overlap to catch any retrospective recording) These records are then transferred back to Albasoft and collated into a single data source which is returned to the National Clinical Data Store (NCDS) at 8am each morning. As a result, all vaccinations recorded either by TMVT or GP IT systems pass through Albasoft in a 24-hour cycle. As part of the agreement to provide these data for EAVE II, vaccination records from both the TMVT and GP IT systems are transferred each day following the National Clinical Data Store processing to the EAVE II secure data store in Public Health Scotland (PHS). This ensures that the EAVE II data are as up to date as possible. It is therefore extremely unlikely that any vaccinations will have been missed.

### **Additional methodological details about Scottish databases**

The Early Pandemic Evaluation and Enhanced Surveillance of COVID-19 (EAVE II) study brings together data from 5.4 million people in Scotland covering ~99% of the national population.<sup>2</sup> Primary care data from 940 general practices were linked to laboratory data from the Electronic Communication of Surveillance in Scotland (ECOSS), hospital discharge data from the Scottish Morbidity Record (SMR) 01 database and Rapid Preliminary Inpatient Data (RAPID),<sup>3</sup> and the death registry from National Records of Scotland (NRS). Vaccination status was ascertained from general practice records and the Turas Vaccination Management Tool (TVMT).<sup>4</sup> ECOSS data included all reverse transcriptase polymerase chain reaction (RT-PCR) test results from both NHS laboratories (Pillar 1 which included high proportions of asymptomatic screening tests) and Lighthouse Government laboratories (Pillar 2, largely symptomatic community tests).<sup>16</sup> Data were deterministically linked using the Community Health Index (CHI) unique identifier.<sup>13</sup> Approvals were obtained from the National Research Ethics Service Committee, Southeast Scotland 02 (reference number: 12/SS/0201), and Public Benefit and Privacy Panel for Health and Social Care (reference number: 1920-0279).

**Figure S3: Data linkage diagram for Brazil**

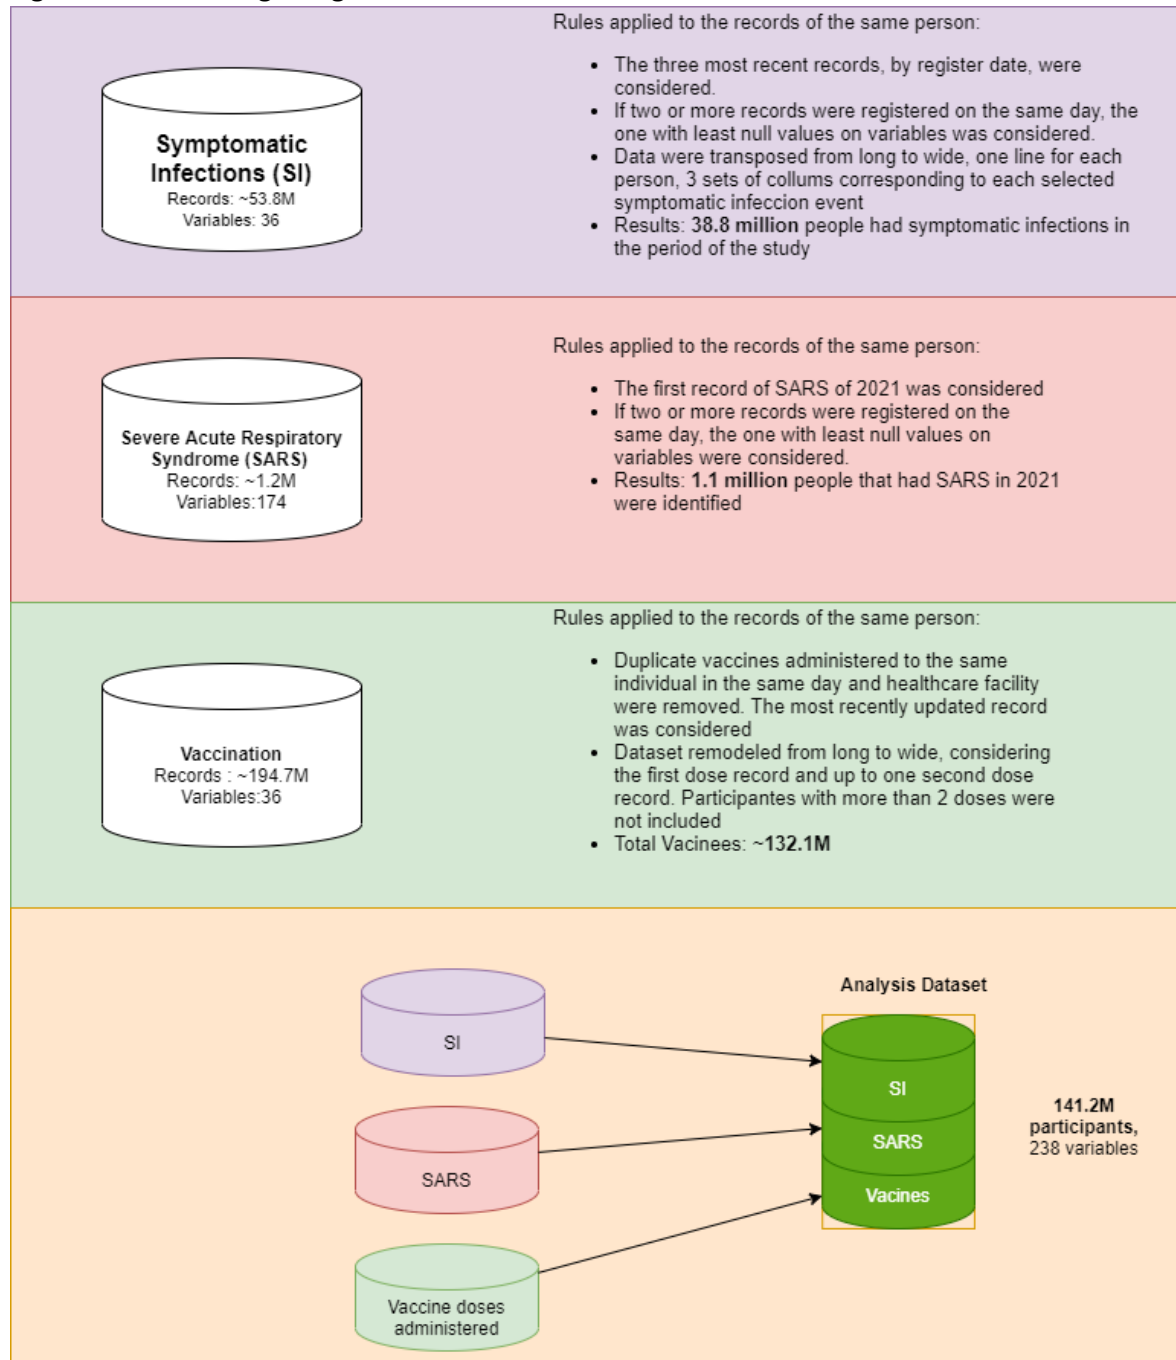

**Additional methodological details about Brazilian databases**

In Brazil, we used three deterministically linked national datasets provided by the Brazilian Ministry of Health Department of Informatics (DATASUS): COVID-19 Vaccination Campaign (SI-PNI) containing all administered vaccine doses; Acute Respiratory Infection Suspected Cases (e-SUS-Notifica) which holds clinical and laboratory data from all suspected cases and contact tracing; and Severe Acute Respiratory Infection/Illness (SIVEP-Gripe) containing all COVID-19 hospitalisations and deaths. The Brazilian National Commission in Research Ethics approved the research protocol (CONEP approval number 4.921.308). All analyses used unidentified secondary data in accordance with the Brazilian



Personal Data Protection General Law (LGPD). Data were manipulated in a secure computing environment, ensuring protection against data leakage and records re-identification.

Figure S4: Distribution of variants over time in Brazil, stratified by region

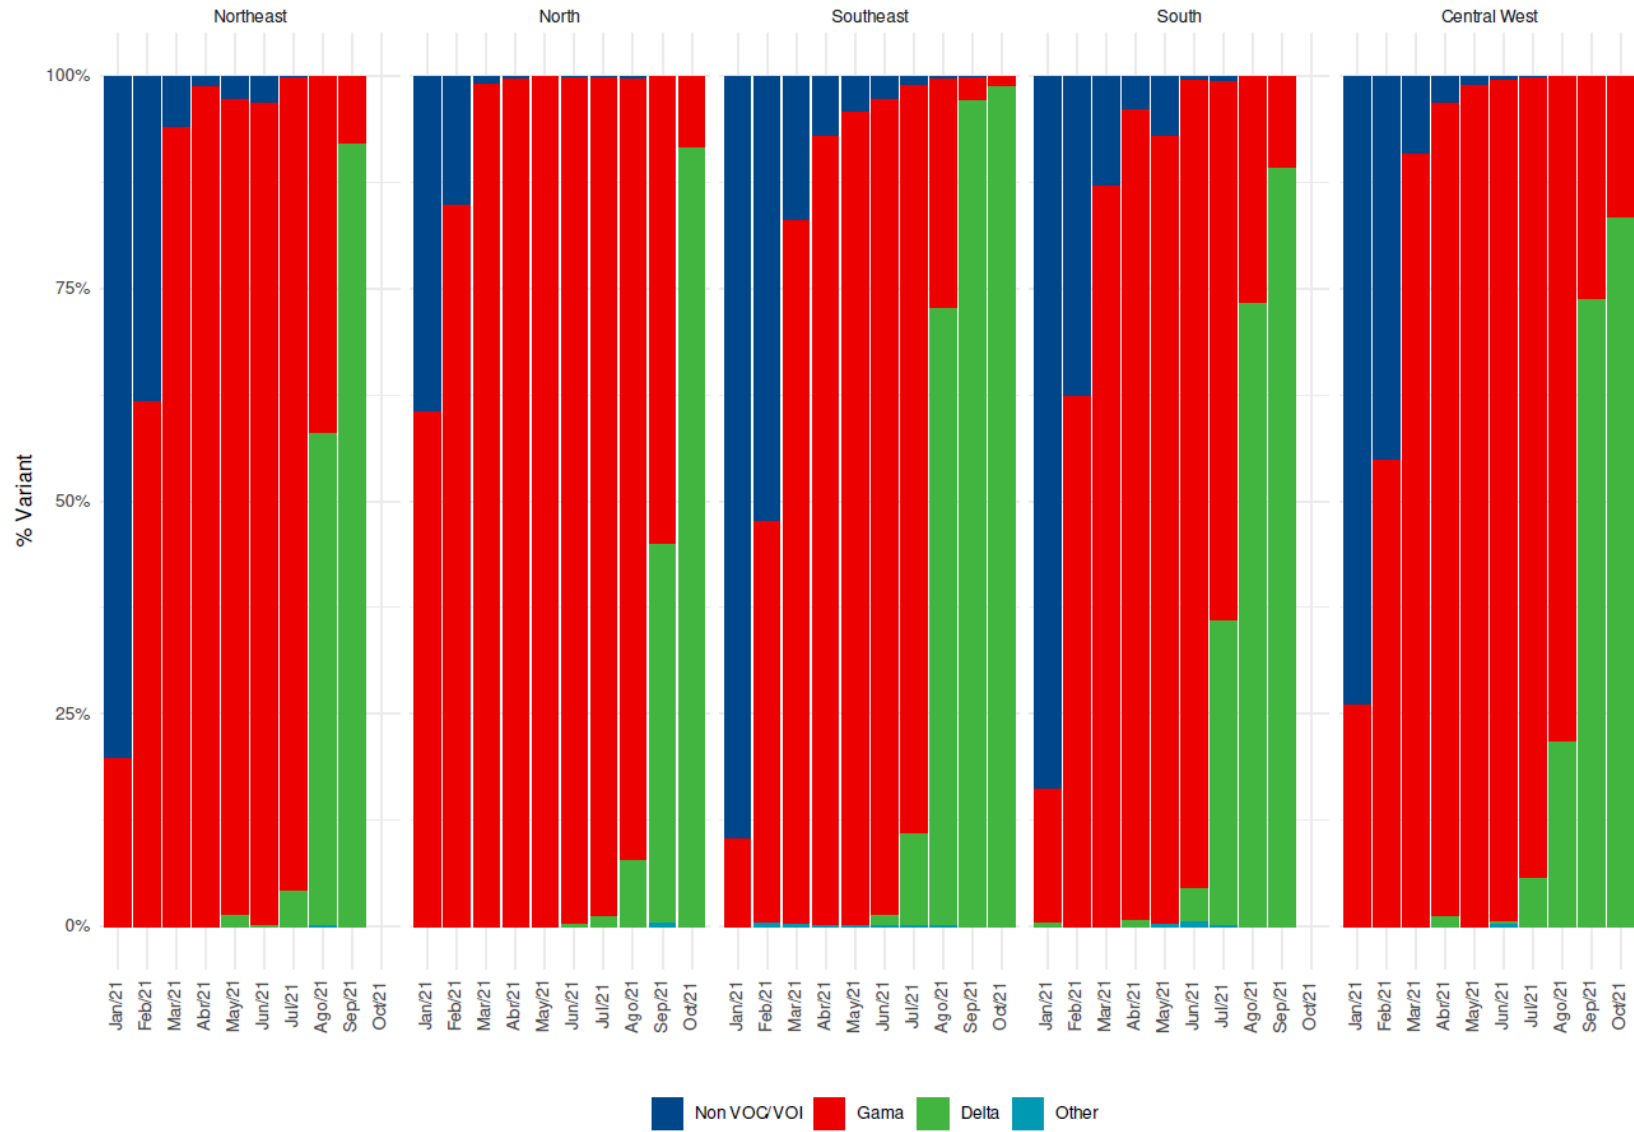

Figure S5: ChAdOx1 two-dose vaccination numbers in Scotland, stratified by age group

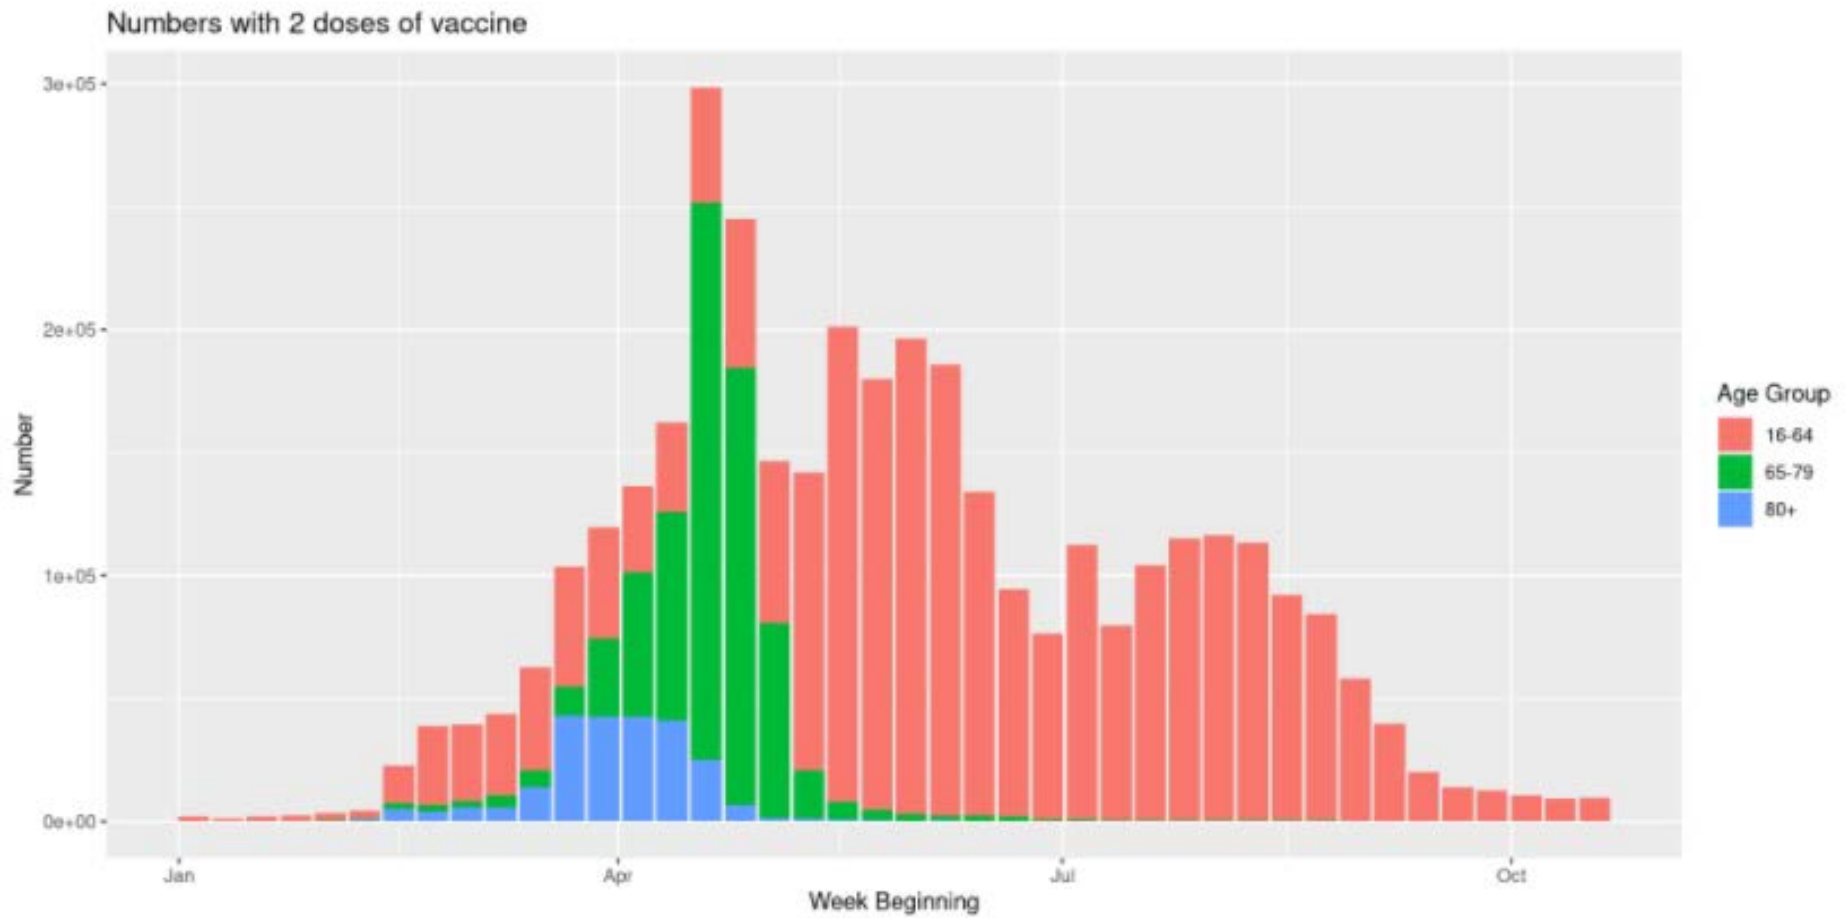

**Figure S6: STROBE Flow diagram for Scotland**  
**Scotland – 2 Dose ChAdOx1 cohort**

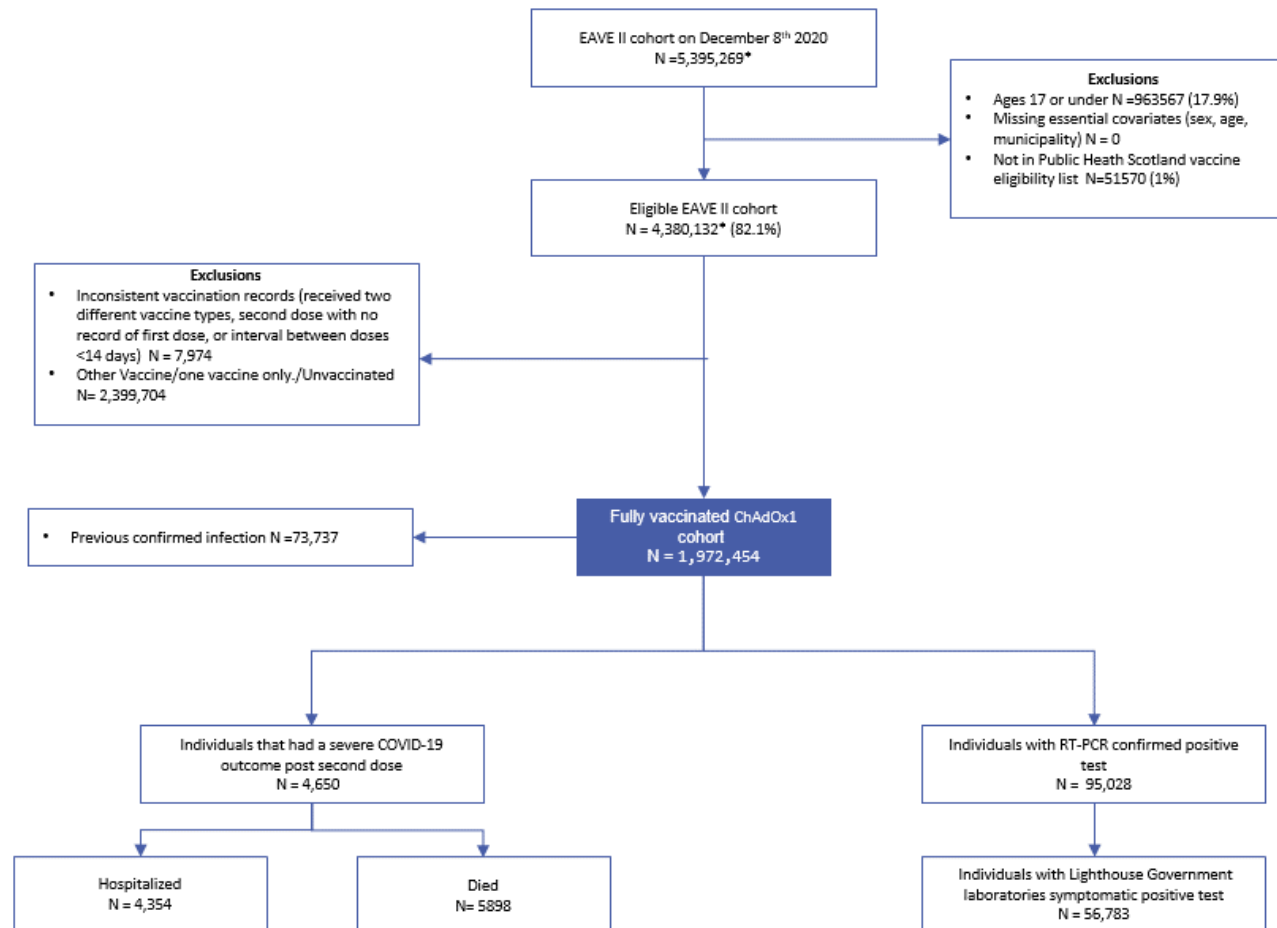

## Scotland – ChAdOx1 Vaccine Effect Cohort

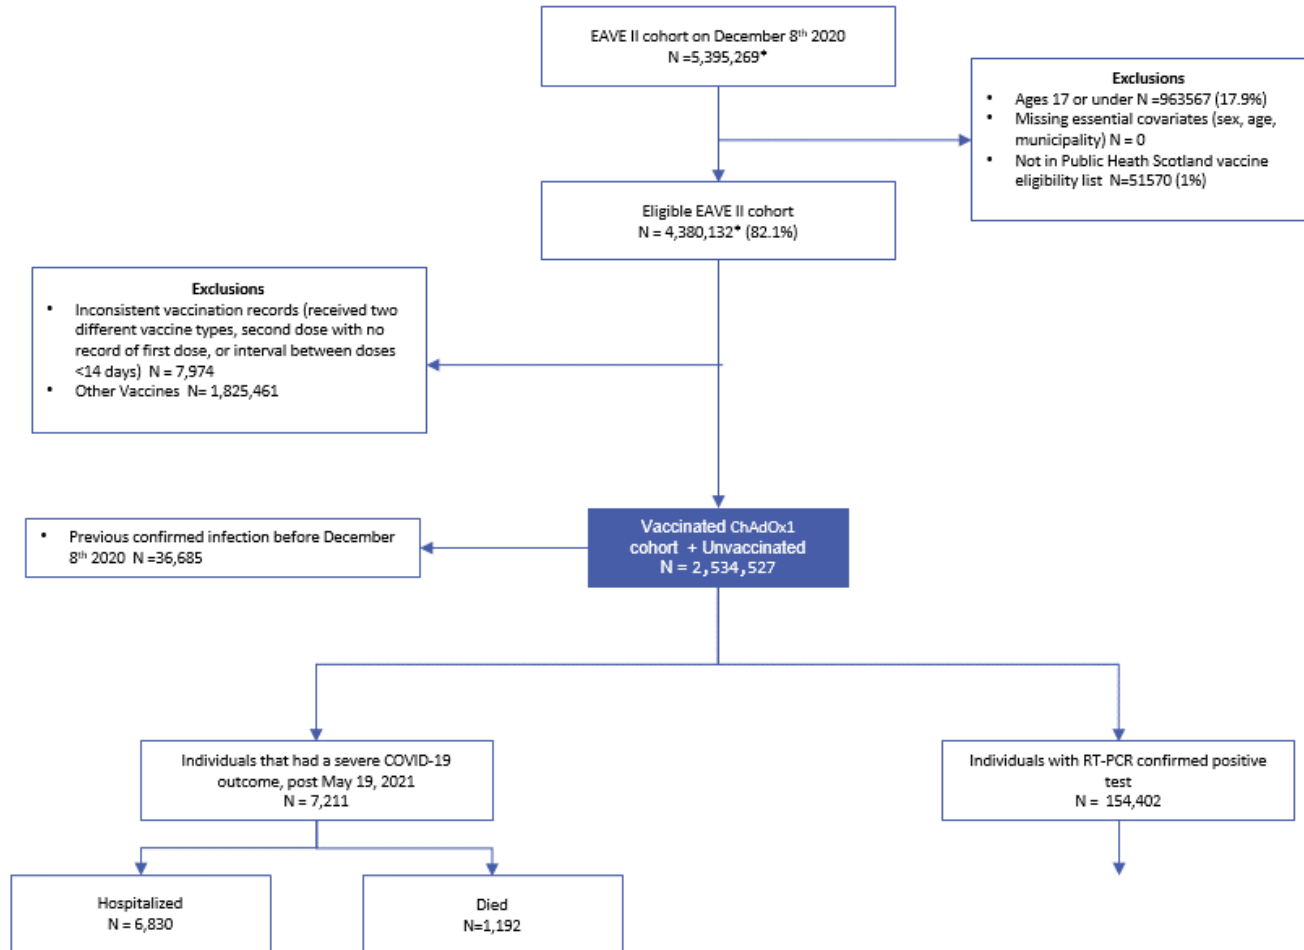

Based upon sampling weights, as the number of records in EAVE II is greater than the population of Scotland

**Figure S7: Trends in COVID-related outcomes in Scotland for: a) COVID-19 hospitalisation or death; b) COVID-19 hospitalisation; c) COVID-19 death; d) SARS-CoV-2 confirmed infection**

**a) COVID-19 hospitalisation or death**

Number of Admissions or Deaths per day in Scotland  
from May 19, 2021

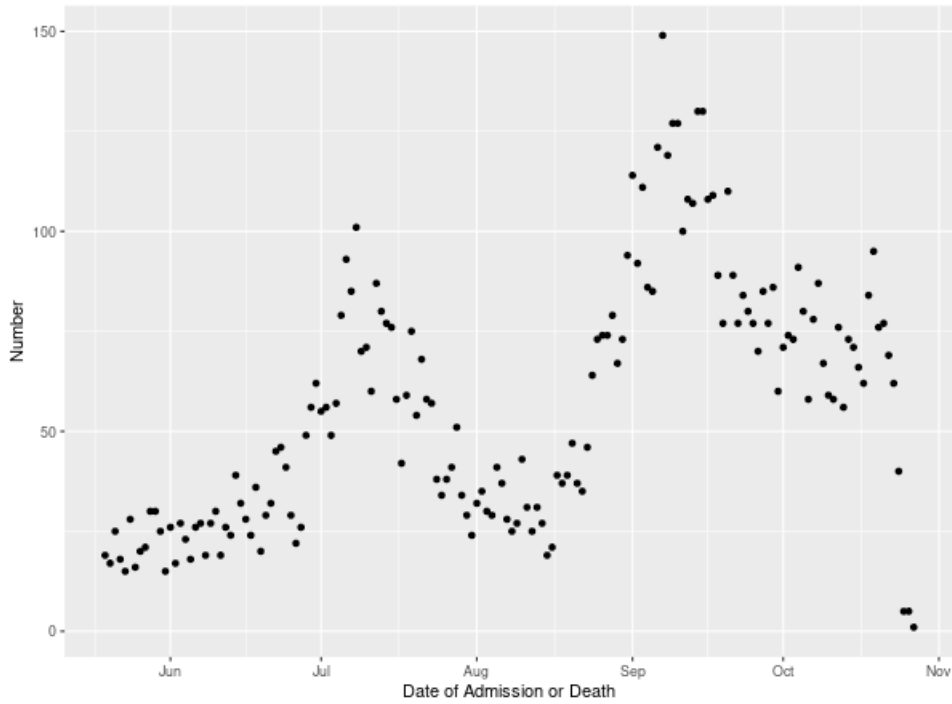

**b) COVID-19 hospitalisation**

Number of Hospital Admissions per day in Scotland  
from May 19, 2021

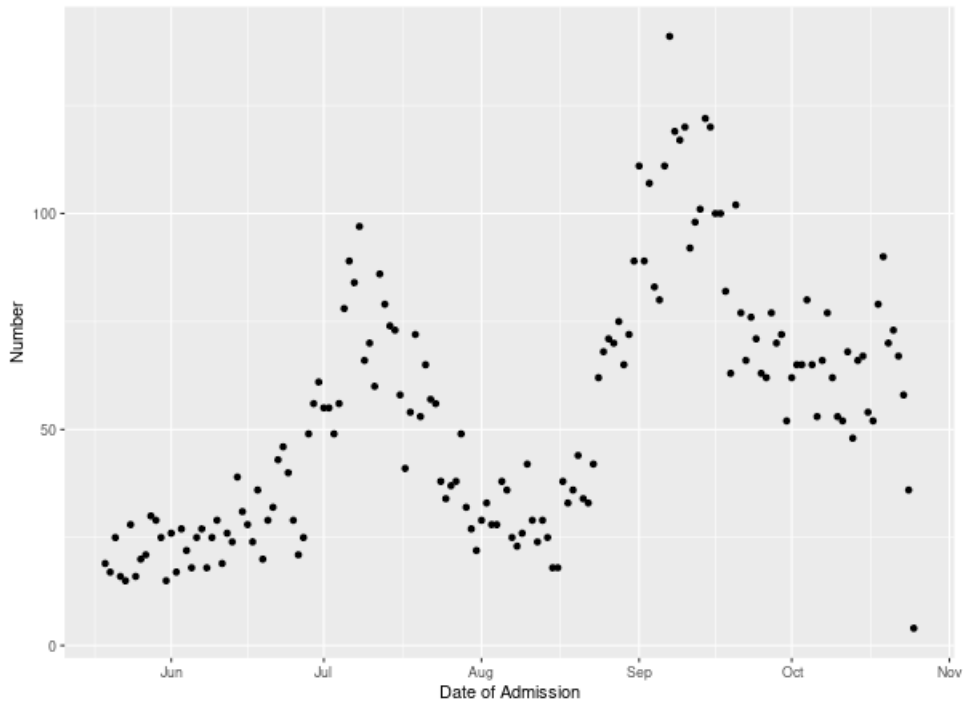

### c) COVID-19 death

Number of Deaths per day in Scotland  
from May 19, 2021

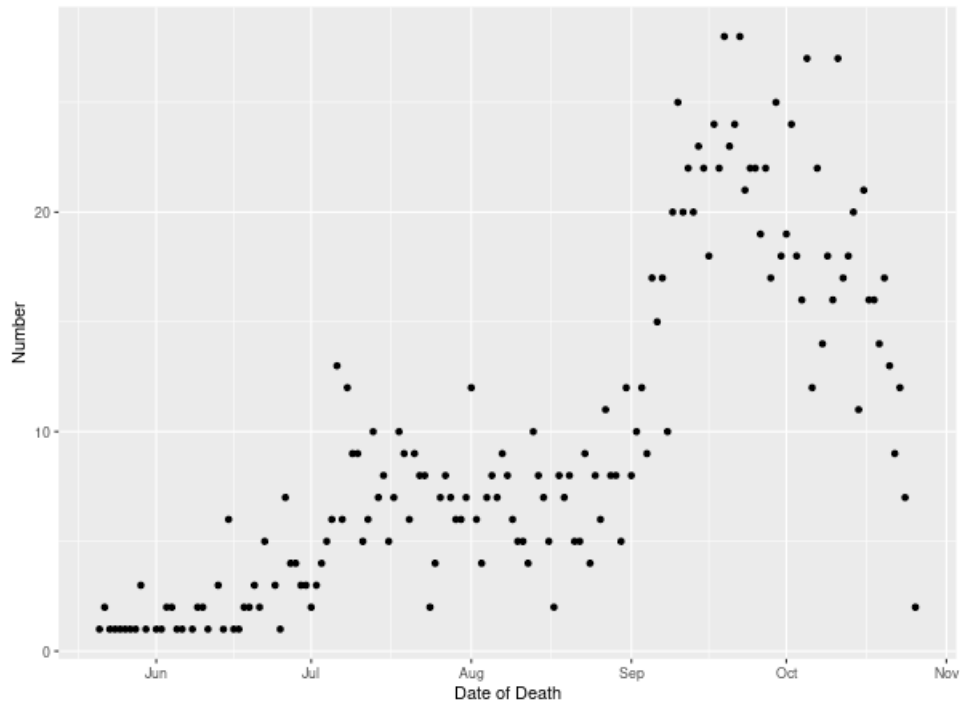

### d) SARS-CoV-2 confirmed infection

Number of Positive Cases per day in Scotland  
from May 19, 2021

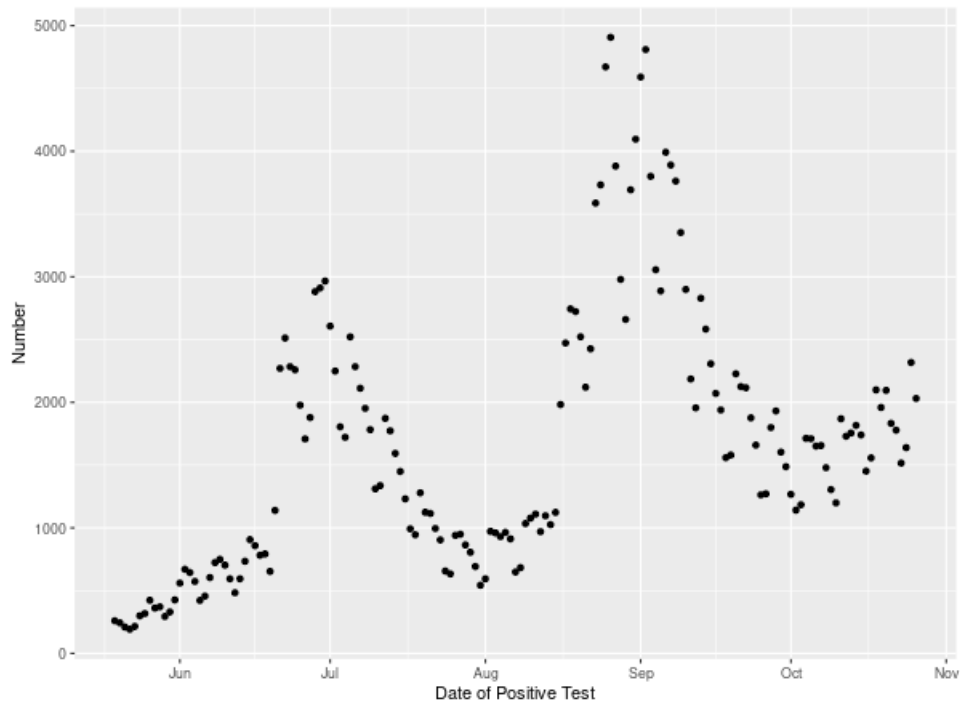

**Figure S8: Association between waning and calendar period effects for vaccines aged 65+ in Scotland**

Most individuals aged 65+ received the ChadOx1 vaccine and virtually all were vaccinated in the period between March 23, 2021 and May 18, 2021, with 330,000 vaccinated in a three-week period (April 14-May 4 2021). The waning period and the calendar period are confounded with the week of vaccination through the age-period cohort paradigm where the week of receiving the second dose represents a cohort of individuals. The use of two-week periods for the vaccine waning partially breaks the linear association but does not completely eliminate it.

This issue can be seen in the table below where the table entries are the post vaccine periods. Within the study period short post vaccine periods were not observed for the majority of the vaccinees. The periods of peak infections are identified by the shading and these correspond to post vaccine periods 4 and 5 and 8-10 for the vaccine cohorts which were the largest groups. Information on the long post vaccination periods 10-12, are also only available within the second peak period.

| Period   | Vaccination Week |          |          |          |          |          |          |          |
|----------|------------------|----------|----------|----------|----------|----------|----------|----------|
|          | 24/03/21         | 31/03/21 | 07/04/21 | 14/04/21 | 21/04/21 | 28/04/21 | 05/05/21 | 12/05/21 |
| 19/05/21 | 4                | 3        | 3        | 2        | 2        | 1        | 1        | 0        |
| 26/05/21 | 4                | 4        | 3        | 3        | 2        | 2        | 1        | 1        |
| 02/06/21 | 5                | 4        | 4        | 3        | 3        | 2        | 2        | 1        |
| 09/06/21 | 5                | 5        | 4        | 4        | 3        | 3        | 2        | 2        |
| 16/06/21 | 6                | 5        | 5        | 4        | 4        | 3        | 3        | 2        |
| 23/06/21 | 6                | 6        | 5        | 5        | 4        | 4        | 3        | 3        |
| 30/06/21 | 7                | 6        | 6        | 5        | 5        | 4        | 4        | 3        |
| 07/07/21 | 7                | 7        | 6        | 6        | 5        | 5        | 4        | 4        |
| 14/07/21 | 8                | 7        | 7        | 6        | 6        | 5        | 5        | 4        |
| 21/07/21 | 8                | 8        | 7        | 7        | 6        | 6        | 5        | 5        |
| 28/07/21 | 9                | 8        | 8        | 7        | 7        | 6        | 6        | 5        |
| 04/08/21 | 9                | 9        | 8        | 8        | 7        | 7        | 6        | 6        |
| 11/08/21 | 10               | 9        | 9        | 8        | 8        | 7        | 7        | 6        |
| 18/08/21 | 10               | 10       | 9        | 9        | 8        | 8        | 7        | 7        |
| 25/08/21 | 11               | 10       | 10       | 9        | 9        | 8        | 8        | 7        |
| 01/09/21 | 11               | 11       | 10       | 10       | 9        | 9        | 8        | 8        |
| 08/09/21 | 12               | 11       | 11       | 10       | 10       | 9        | 9        | 8        |

Within each of the vaccine cohorts it is difficult to segregate the trends in the post vaccine period from the calendar period trend. Changes in trend were identified. In the graphs below the event rates for hospitalisation or death are shown by calendar period and by post vaccine period for the seven weekly vaccine cohorts. In the first chart the temporal trend can be seen with an approximate linear increase in rates up to the first peak then a decline followed by another increase. In the second chart there is a linear trend for increasing hospitalisation rates with increasing post vaccine period and this linear trend cannot be separated out from the temporal trend in this age group.



A similar situation exists for the 80+ age group. However, for those aged under 65, sufficient numbers entered the vaccinated cohort from the beginning of April onwards that there is representation of all post vaccine periods from 0-1 weeks post vaccination to 19-20 weeks post vaccination in all calendar periods during the study period.

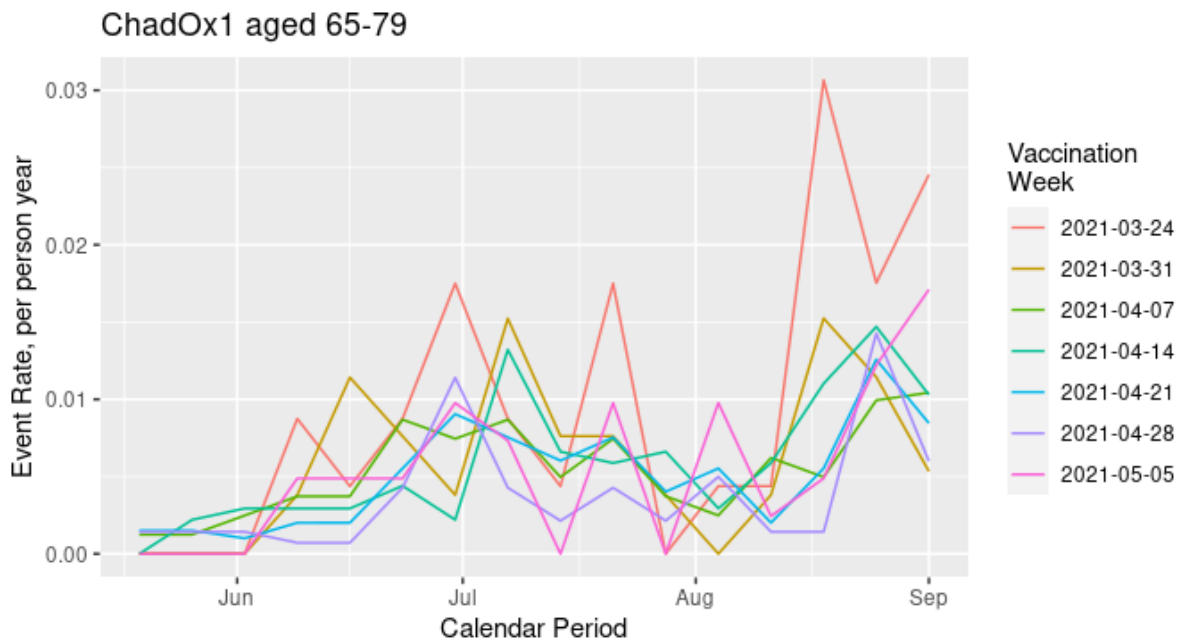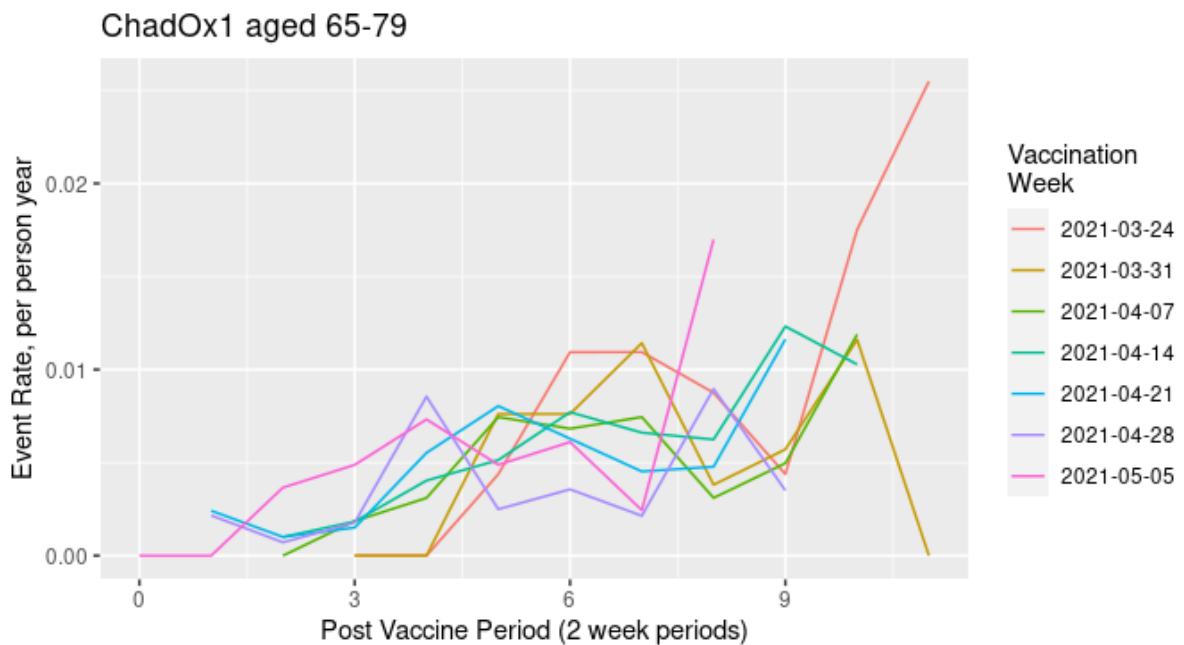

Figure S9: STROBE Flow diagram for Brazil

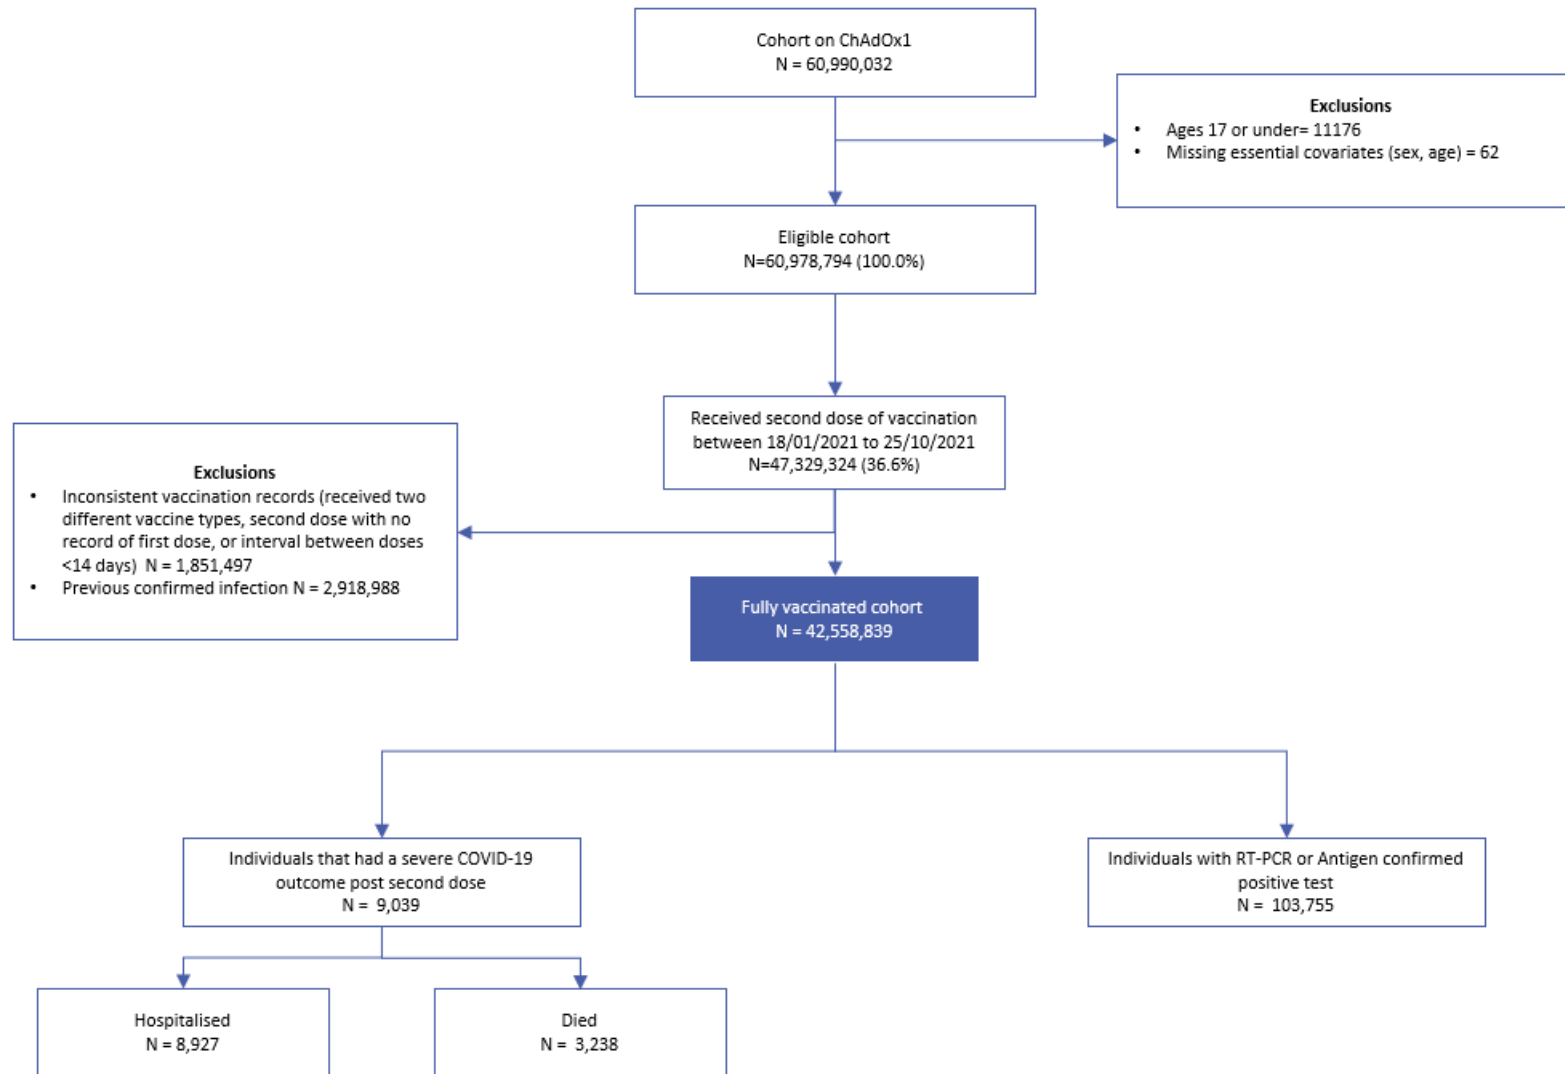

**Figure S10: Monthly numbers of: a) COVID-19 hospitalisation or death; b) COVID-19 hospitalisation; c) COVID-19 death; d) SARS-CoV-2 confirmed symptomatic infection in Brazil, stratified by age group**

**A)**

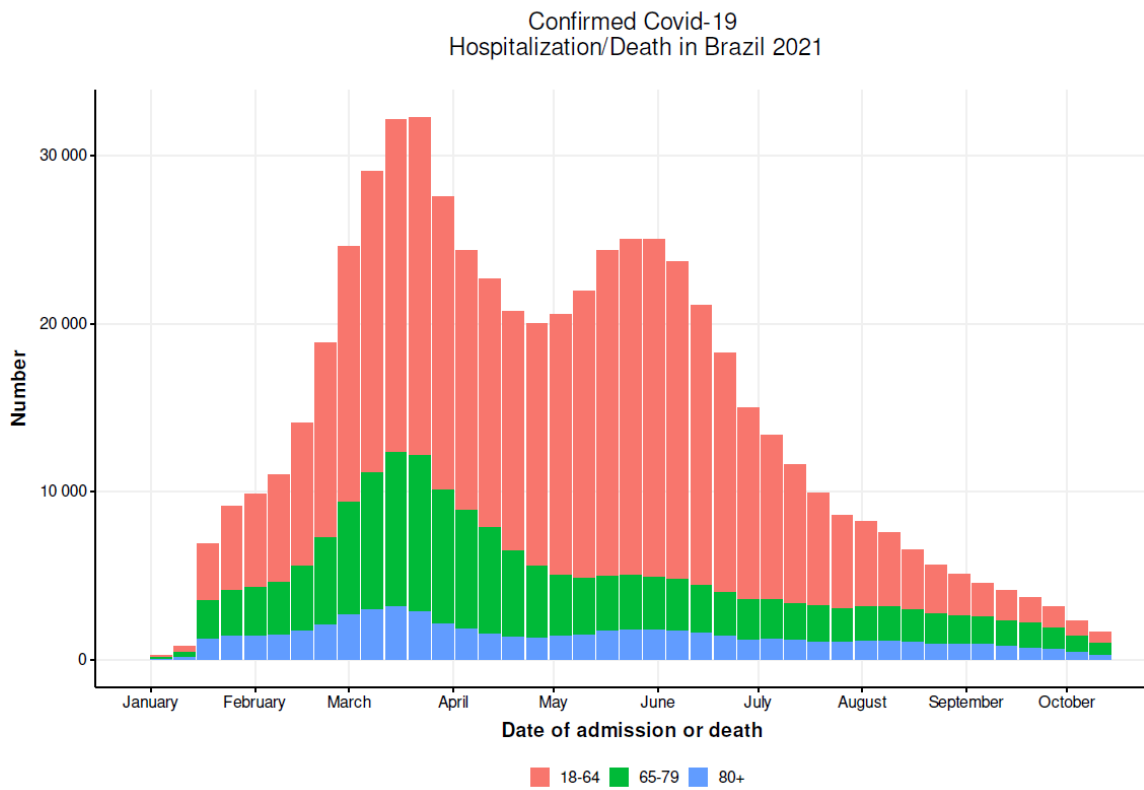

**B)**

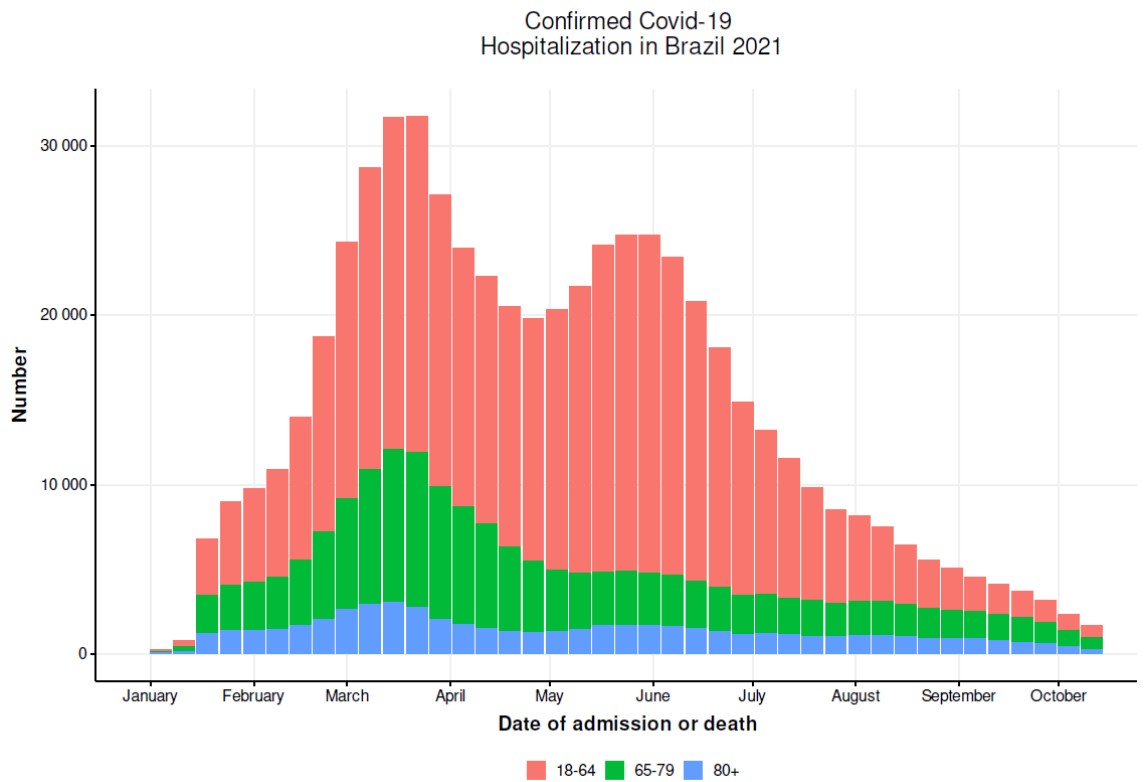

c)

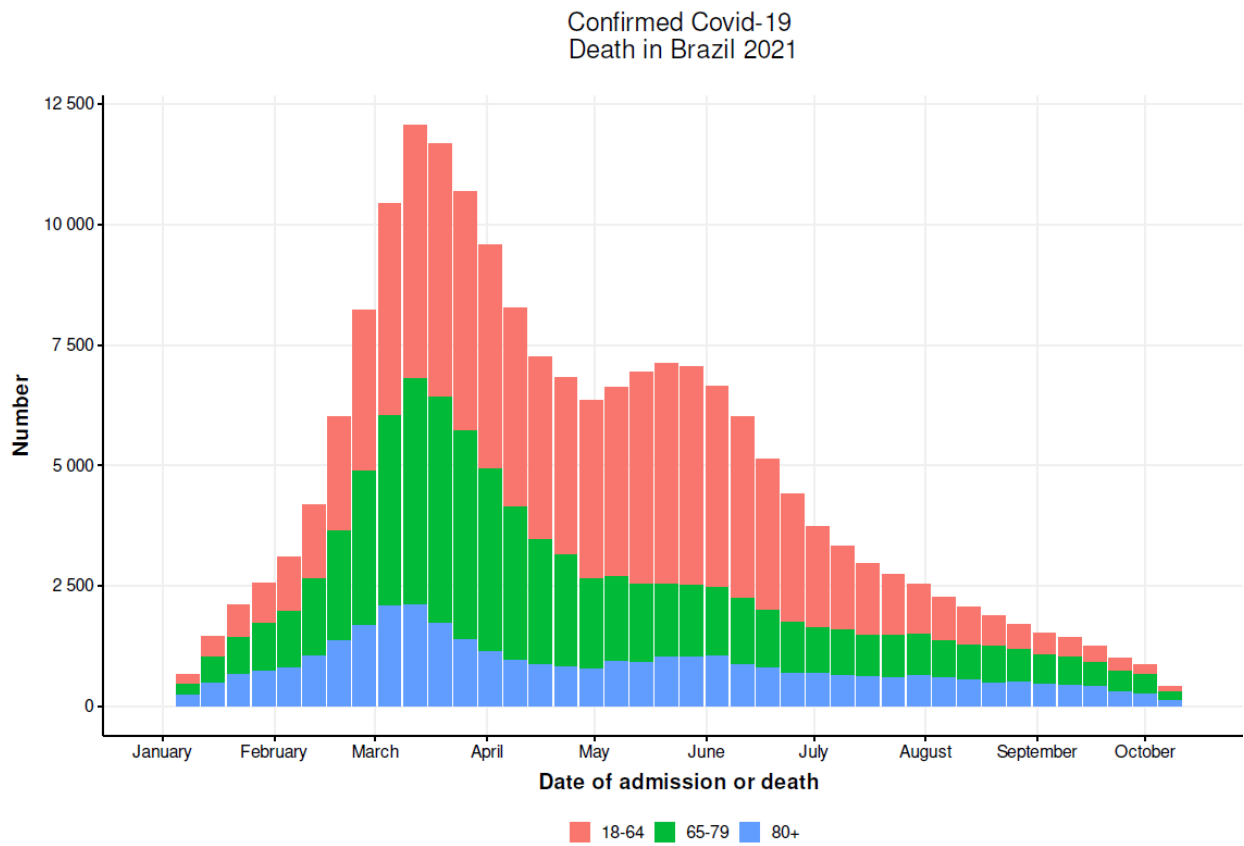

d)

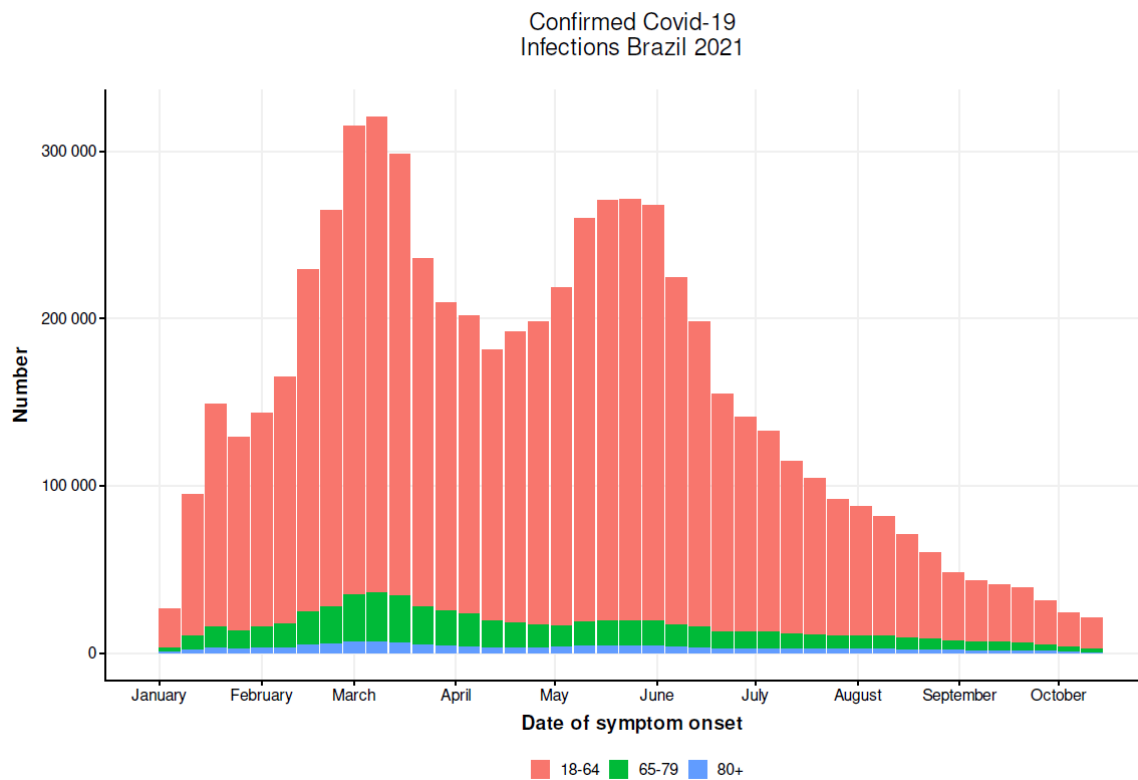

**Figure S11: Cumulative uptake for receipt of any vaccination in Brazil, stratified by age group**

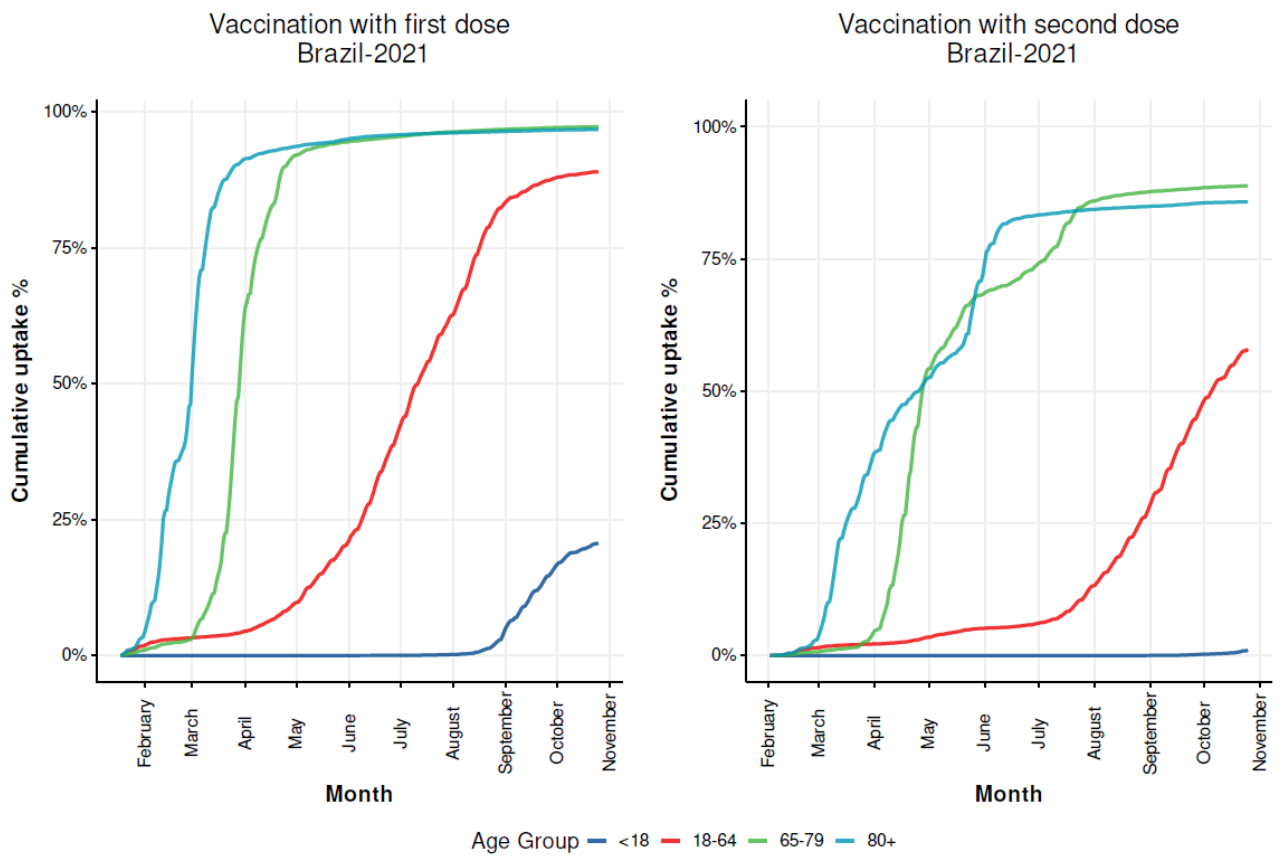

**Figure S12: ChAdOx1 vaccination numbers in Brazil, stratified by age group**

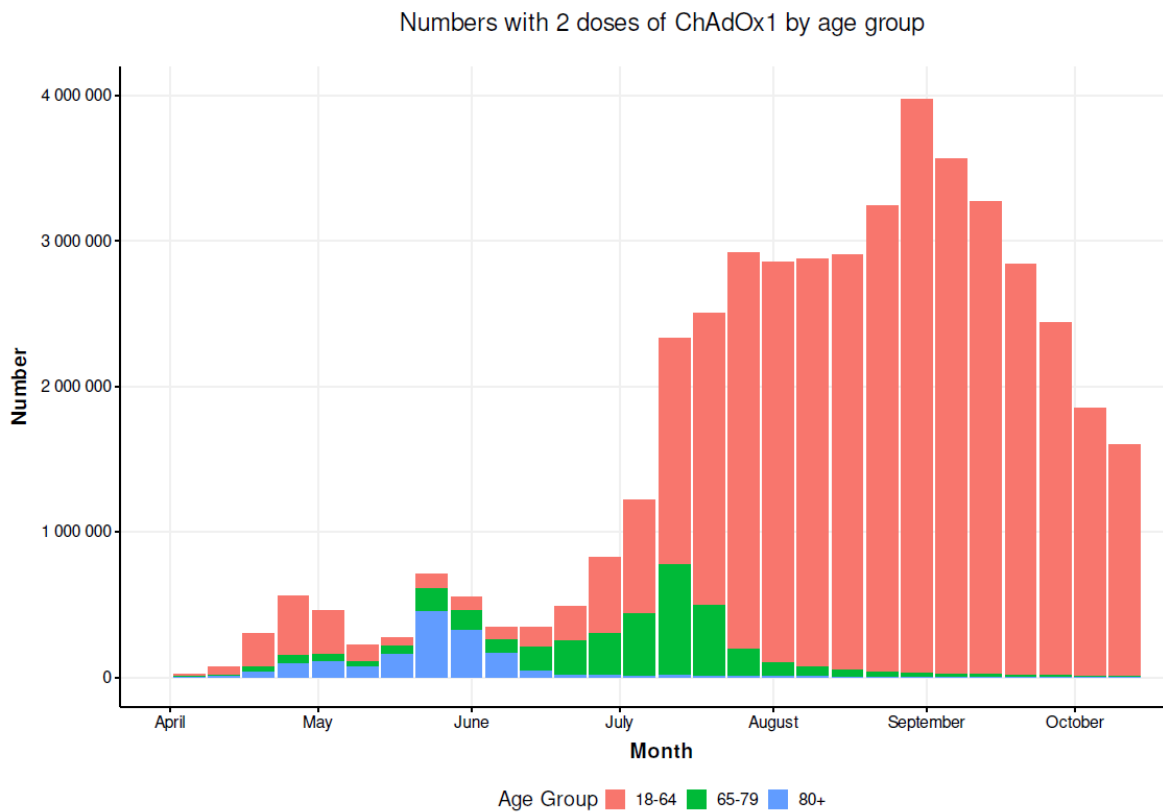

## References

1. Vasileiou E, Simpson CR, Shi T, et al. Interim findings from first-dose mass COVID-19 vaccination roll-out and COVID-19 hospital admissions in Scotland: a national prospective cohort study. *The Lancet* 2021;397:1646-57.
2. Simpson CR, Robertson C, Vasileiou E, et al. Early Pandemic Evaluation and Enhanced Surveillance of COVID-19 (EAVE II): protocol for an observational study using linked Scottish national data. *BMJ Open* 2020;10:e039097.
3. National Data Catalogue. Rapid Preliminary Inpatient Data (RAPID). 2021. (Accessed 14/3/2021, at <https://www.ndc.scot.nhs.uk/National-Datasets/data.asp?SubID=37>.)
4. Turas Vaccine Management Tool. 2021. (Accessed 14/3/2021, at <https://learn.nes.nhs.scot/42708/turas-vaccination-management-tool>.)
